# Supplementary material for: Effects of Vitamin B12 Supplementation on Cognitive Function, Depressive Symptoms, and Fatigue: A Systematic Review, Meta-Analysis, and Meta-Regression
Source: PubMed Central journal article supplement (PMC8000524; doi:10.3390/nu13030923), 2021-03-12
Supplement: nutrients-13-00923-s001.pdf [file nutrients-13-00923-s001.pdf]

## Supplement Table S1: Search strategies

### Ovid MEDLINE®

| # | Searches                                                                                                                                                                                                                                                                                                                                                                                                                                                                       | Results   |
|---|--------------------------------------------------------------------------------------------------------------------------------------------------------------------------------------------------------------------------------------------------------------------------------------------------------------------------------------------------------------------------------------------------------------------------------------------------------------------------------|-----------|
| 1 | exp Vitamin B 12/ or (vitamin B12 or vitamin b-12 or hydroxocobalamin or cyanocobalamin or b12 or b 12 or Docibin or Ducobee or cobalamin or methylcobalamin or adenosylcobalamin or mecobalamin or ydroxycobalamin).ti,ab.                                                                                                                                                                                                                                                    | 36,306    |
| 2 | exp Cognition/ or exp Fatigue/ or exp Lethargy/ or exp sleepiness/ or exp Attention/ or exp Depression/ or (fatigue or tiredness or weariness or exhaustion or attentiveness or listlessness or lethargy or cognition or avolition or sluggishness or sleepiness or drowsiness or concentration or focus or attention or forgetfulness or mood or depressed or depressive or depression*).ti,ab. or (cognitive adj1 (impairment or function or performance or decline)).ti,ab. | 2,950,374 |
| 3 | (randomized controlled trial or controlled clinical trial).pt. or randomized.ti,ab. or randomised.ti,ab. or placebo.ti,ab. or drug therapy.fs. or randomly.ti,ab. or trial.ti,ab. or groups.ti,ab.                                                                                                                                                                                                                                                                             | 4,795,717 |
| 4 | 1 and 2 and 3                                                                                                                                                                                                                                                                                                                                                                                                                                                                  | 1,805     |
| 5 | 4 not (animals not humans).sh.                                                                                                                                                                                                                                                                                                                                                                                                                                                 | 1,627     |

### Embase®

| # | Searches                                                                                                                                                                                                                                                                                                                                                                                                                                                                                                                                                                                                                                                                                                   | Results   |
|---|------------------------------------------------------------------------------------------------------------------------------------------------------------------------------------------------------------------------------------------------------------------------------------------------------------------------------------------------------------------------------------------------------------------------------------------------------------------------------------------------------------------------------------------------------------------------------------------------------------------------------------------------------------------------------------------------------------|-----------|
| 1 | 'cyanocobalamin'/exp OR 'hydroxocobalamin'/exp OR 'vitamin b12':ti,ab OR 'vitamin b-12':ti,ab OR hydroxocobalamin:ti,ab OR cyanocobalamin:ti,ab OR 'b12':ti,ab OR 'b 12':ti,ab OR docibin:ti,ab OR ducobee:ti,ab OR cobalamin:ti,ab OR methylcobalamin:ti,ab OR adenosylcobalamin:ti,ab OR mecobalamin:ti,ab OR hydroxycobalamin:ti,ab                                                                                                                                                                                                                                                                                                                                                                     | 57,879    |
| 2 | 'cognition'/exp OR 'fatigue'/exp OR 'lethargy'/exp OR 'listlessness'/exp OR 'somnolence'/exp OR 'drowsiness'/exp OR 'depression'/exp OR 'attention'/exp OR 'cognitive defect'/exp OR 'memory'/exp OR fatigue:ti,ab OR tiredness:ti,ab OR weariness:ti,ab OR exhaustion:ti,ab OR attentiveness:ti,ab OR listlessness:ti,ab OR lethargy:ti,ab OR cognition:ti,ab OR avolition:ti,ab OR sluggishness:ti,ab OR sleepiness:ti,ab OR drowsiness:ti,ab OR concentration:ti,ab OR focus:ti,ab OR attention:ti,ab OR forgetfulness:ti,ab OR mood:ti,ab OR depressed:ti,ab OR depressive:ti,ab OR depression*:ti,ab OR memory:ti,ab OR ((cognitive NEAR/1 (impairment OR function OR performance OR decline)):ti,ab) | 5,695,399 |
| 3 | 'crossover procedure':de OR 'double-blind procedure':de OR 'randomized controlled trial':de OR 'single-blind procedure':de OR random*:de,ab,ti OR factorial*:de,ab,ti OR crossover*:de,ab,ti OR ((cross NEXT/1 over*):de,ab,ti) OR placebo*:de,ab,ti OR ((doubl* NEAR/1 blind*):de,ab,ti) OR ((singl* NEAR/1 blind*):de,ab,ti) OR assign*:de,ab,ti OR allocat*:de,ab,ti OR volunteer*:de,ab,ti                                                                                                                                                                                                                                                                                                             | 2,567,179 |
| 4 | #1 AND #2 AND #3                                                                                                                                                                                                                                                                                                                                                                                                                                                                                                                                                                                                                                                                                           | 2,070     |
| 5 | #1 AND #2 AND #3 NOT [conference abstract]/lim NOT ([animals]/lim NOT [humans]/lim)                                                                                                                                                                                                                                                                                                                                                                                                                                                                                                                                                                                                                        | 1,647     |

## PsycINFO

| # | Searches                                                                                                                                                                                                                                                                                                                                                                                                                                                                                                                                                                                                                                                                                                                                                                                                                                                                           | Results   |
|---|------------------------------------------------------------------------------------------------------------------------------------------------------------------------------------------------------------------------------------------------------------------------------------------------------------------------------------------------------------------------------------------------------------------------------------------------------------------------------------------------------------------------------------------------------------------------------------------------------------------------------------------------------------------------------------------------------------------------------------------------------------------------------------------------------------------------------------------------------------------------------------|-----------|
| 1 | TI ( (vitamin B12 OR vitamin b-12 OR hydroxocobalamin OR cyanocobalamin OR b12 OR b 12 OR Docibin OR Ducobee OR cobalamin OR methylcobalamin OR adenosylcobalamin OR mecobalamin OR hydroxycobalamin) ) OR AB ( (vitamin B12 OR vitamin b-12 OR hydroxocobalamin OR cyanocobalamin OR b12 OR b 12 OR Docibin OR Ducobee OR cobalamin OR methylcobalamin OR adenosylcobalamin OR mecobalamin OR hydroxycobalamin) )                                                                                                                                                                                                                                                                                                                                                                                                                                                                 | 8,842     |
| 2 | TI ( (fatigue OR tiredness OR weariness OR exhaustion OR attentiveness OR listlessness OR lethargy OR cognition OR avolition OR sluggishness OR sleepiness OR drowsiness OR concentration OR focus OR attention OR forgetfulness OR mood OR depressed OR depressive OR depression* OR memory) OR (cognitive N1 (impairment OR function OR performance OR decline)) ) OR AB ( (fatigue OR tiredness OR weariness OR exhaustion OR attentiveness OR listlessness OR lethargy OR cognition OR avolition OR sluggishness OR sleepiness OR drowsiness OR concentration OR focus OR attention OR forgetfulness OR mood OR depressed OR depressive OR depression* OR memory) OR (cognitive N1 (impairment OR function OR performance OR decline)) ) OR ( DE "Cognition" OR DE "Fatigue" OR DE "Sleepiness" OR DE "Attention" OR DE "Major Depression" OR DE "Memory" OR DE "Forgetting" ) | 1,228,483 |
| 3 | TI ( placebo* OR random* OR "comparative stud*" OR clinical N3 trial* OR research N3 design OR evaluat* N3 stud* OR prospectiv* N3 stud* OR (singl* OR doubl* OR trebl* OR tripl*) N3 (blind* OR mask*) ) OR AB ( placebo* OR random* OR "comparative stud*" OR clinical N3 trial* OR research N3 design OR evaluat* N3 stud* OR prospectiv* N3 stud* OR (singl* OR doubl* OR trebl* OR tripl*) N3 (blind* OR mask*) ) OR ( DE "Treatment Outcomes" OR DE "Treatment Effectiveness Evaluation" OR DE "Placebo" OR DE "Followup Studies" )                                                                                                                                                                                                                                                                                                                                          | 422,395   |
| 4 | S1 AND S2 AND S3                                                                                                                                                                                                                                                                                                                                                                                                                                                                                                                                                                                                                                                                                                                                                                                                                                                                   | 717       |

## Cochrane Library

| # | Searches                                                                                                                                                                                                                                                                                                                                                 | Results |
|---|----------------------------------------------------------------------------------------------------------------------------------------------------------------------------------------------------------------------------------------------------------------------------------------------------------------------------------------------------------|---------|
| 1 | ("vitamin B12" OR "vitamin b-12" OR hydroxocobalamin OR cyanocobalamin OR "b12" OR "b 12" OR Docibin OR Ducobee OR cobalamin OR methylcobalamin OR adenosylcobalamin OR mecobalamin OR hydroxycobalamin):ti,ab,kw                                                                                                                                        | 3,601   |
| 2 | (fatigue OR tiredness OR weariness OR exhaustion OR attentiveness OR listlessness OR lethargy OR cognition OR avolition OR sluggishness OR sleepiness OR drowsiness OR concentration OR focus OR attention OR forgetfulness OR mood OR depressed OR depressive OR depression* OR memory OR (cognitive NEAR/1 (impairment OR f ti OR f OR d li ))) ti b k | 280,546 |
| 3 | #1 AND #2                                                                                                                                                                                                                                                                                                                                                | 1,043   |

## Scopus

| # | Searches                                                                                                                                                                                                                                                                                                                                                                                                                                                                                                                                                                                                                                                                                                                                                                                                                                                                                                                                                                                                                                                                                                                                                                                                                                                                                                                                                                                                                                                                                                                                                                                                                                                                                                                                                              | Results |
|---|-----------------------------------------------------------------------------------------------------------------------------------------------------------------------------------------------------------------------------------------------------------------------------------------------------------------------------------------------------------------------------------------------------------------------------------------------------------------------------------------------------------------------------------------------------------------------------------------------------------------------------------------------------------------------------------------------------------------------------------------------------------------------------------------------------------------------------------------------------------------------------------------------------------------------------------------------------------------------------------------------------------------------------------------------------------------------------------------------------------------------------------------------------------------------------------------------------------------------------------------------------------------------------------------------------------------------------------------------------------------------------------------------------------------------------------------------------------------------------------------------------------------------------------------------------------------------------------------------------------------------------------------------------------------------------------------------------------------------------------------------------------------------|---------|
| 5 | <p>( TITLE-ABS-KEY ( "vitamin B12" OR "vitamin b-12" OR hydroxocobalamin OR cyanocobalamin OR b12 OR "b 12" OR Docibin OR Ducobee OR cobalamin OR methylcobalamin OR adenosylcobalamin OR mecobalamin OR hydroxycobalamin ) ) AND ( TITLE-ABS-KEY ( fatigue OR tiredness OR weariness OR exhaustion OR attentiveness OR listlessness OR lethargy OR cognition OR avolition OR sluggishness OR sleepiness OR drowsiness OR {concentration} OR {focus} OR attention OR forgetfulness OR mood OR depressed OR depressive OR depression OR memory OR ( cognitive W/1 ( impairment OR function OR performance OR decline ) ) ) ) AND ( TITLE-ABS-KEY ( random* OR crossover* OR crossingover* OR factorial* OR placebo* OR volunteer* OR control* OR prospectiv* OR volunteer* OR ( ( singl* OR doubl* OR trebl* OR tripl* ) AND ( blind* OR mask ) ) OR ( clin* AND trial* ) ) OR TITLE-ABS-KEY ( "randomized controlled trial" OR randomization OR "controlled study" OR "multicenter study" OR "phase 3 clinical trial" OR "phase 4 clinical trial" OR "double blind procedure" OR "single blind procedure" OR "randomized controlled trial" OR "controlled clinical trial" OR "random allocation" OR "double blind method" OR "single blind method" OR "clinical trial" OR placebo OR "research design" OR "comparative study" OR "evaluation studies" OR "follow up studies" OR "prospective studies" ) ) AND NOT ( TITLE-ABS-KEY ( ( animal OR ewe OR lamb OR rat OR mouse OR mice OR rodent OR horse OR equine OR cow OR bacteria* OR "E.coli" OR "E. coli" OR column OR extraction OR dog OR canine OR pig ) AND NOT ( human OR patient OR children OR older* OR elder* OR people OR women OR men OR girl OR boy OR addict OR infant OR toddler OR adult ) ) )</p> | 5,216   |

**Supplement Table S2: Clinical tests used in the included studies**

| Test                                          | Description                                                                                                                 | Author, year                                             | References                                                                                                                                                                                                                                                                            |
|-----------------------------------------------|-----------------------------------------------------------------------------------------------------------------------------|----------------------------------------------------------|---------------------------------------------------------------------------------------------------------------------------------------------------------------------------------------------------------------------------------------------------------------------------------------|
| <i>Cognitive Executive</i>                    |                                                                                                                             |                                                          |                                                                                                                                                                                                                                                                                       |
| Block design                                  | Rearrange different colored blocks (white, red, or both white and red) to match a pattern (7 templates).                    | Lewerin, 2005 [79]                                       | Wechsler D. The measurement and appraisal of adult intelligence. Baltimore, MD: Williams & Wilkins; 1958.                                                                                                                                                                             |
| Category Fluency Test (CFT)                   | To name animals, vegetables and fruits in 1 min each                                                                        | Kwok, 2017 [74]<br>Kwok, 2020 [86]                       | Acevedo A, Loewenstein DA, Barker WW, Harwood DG, Luis C, Bravo M, Hurwitz DA, Aguero H, Greenfield L, Duara R. Category Fluency Test: Normative data for English- and Spanishspeaking elderly. <i>J Int Neuropsychol Soc</i> 2000; 6: 760-9.                                         |
| Category Word Fluency Test                    | Name as many words as possible of a specific category (during a 1 minute period).                                           | McMahon, 2006 [80]                                       | Lezak MD. Neuropsychological assessment. 3rd ed. New York: Oxford University Press, 1995.                                                                                                                                                                                             |
| Clock Drawing Test (CDT)                      | Draw the face of a clock, mark in the hours and then draw the hands to indicate a specified time (for example, 10 past 10). | Ford, 2010 [77]                                          | Brody H, Moore CM. The Clock Drawing Test for dementia of the Alzheimer's type: a comparison of three scoring methods in a memory disorders clinic. <i>Int J Geriatr Psychiatry</i> 1997;12:619–627.                                                                                  |
| Complex Figure of Rey, Copy                   | Copy the complex figure of Rey (a standard design of shapes and lines) from an example.                                     | Eussen, 2006 [87]                                        | Visser RSH. Manual of the Complex Figure Test. Lisse, Netherlands: Swets & Zeitlinger, 1985.                                                                                                                                                                                          |
| Controlled Oral Word Association Test (COWAT) | Name as many words as possible starting with a particular letter (during a 1 minute period, 3 letters were given).          | Kwok, 2017 [74]<br>Kwok, 2020 [86]<br>McMahon, 2006 [80] | Patterson J. Controlled Oral Word Association Test. In: Kreutzer J, DeLuca J, Caplan B, eds. <i>Encyclopedia of Clinical Neuropsychology</i> . New York: Springer; 2011. pp. 703-6.<br><br>Benton A, Hamsher K. <i>Multilingual Aphasia Examination</i> . Iowa City, Iowa: AJA, 1989. |
| Figure Classification                         | Mark the figure that is different in a set of 5 figures.                                                                    | Lewerin, 2005 [79]                                       | Thurstone LL. Primary mental abilities. <i>Psychometric monographs</i> . Chicago, IL: University of Chicago Press, 1938:5.                                                                                                                                                            |

| Test                                                      | Description                                                                                                                                                                                                                                        | Author, year                                                            | References                                                                                                                                                                                                                                           |
|-----------------------------------------------------------|----------------------------------------------------------------------------------------------------------------------------------------------------------------------------------------------------------------------------------------------------|-------------------------------------------------------------------------|------------------------------------------------------------------------------------------------------------------------------------------------------------------------------------------------------------------------------------------------------|
| Motor Planning 3                                          | Press 1 of 3 buttons adjacent to a lit button as quickly as possible.                                                                                                                                                                              | Eussen, 2006 [87]                                                       | Houx P. Cognitive aging and health-related factors. Maastricht, Netherlands: Maastricht University, 1991:113–21.                                                                                                                                     |
| Raven's Progressive Matrices                              | Identify the missing element that completes a pattern.                                                                                                                                                                                             | Eussen, 2006 [87]<br>McMahon, 2006 [80]                                 | Raven J. Guide to using the Coloured Progressive Matrices. London, United Kingdom: HK Lewis, 1965.                                                                                                                                                   |
| Similarities Wechsler Adult Intelligence Scale (WAIS)     | Describe the similarities between 5 pairs of nouns.                                                                                                                                                                                                | Eussen, 2006 [87]                                                       | Wechsler D. Manual for the Wechsler Adult Intelligence Scale—revised. New York, NY: Psychological Corporation, 1981.                                                                                                                                 |
| Stroop Color-Word Test<br>Stroop Color-Word Test Abridged | Task 1: Read the color name given in black ink.<br>Task 2: Name the colored rectangles.<br>Task 3: Name the ink color of the printed words rather than the word                                                                                    | Eussen, 2006 [87]<br>van Uffelen, 2008 [83]                             | Stroop J. Studies of interference in serial verbal reactions. J Exp Psychol 1935;18:643–662.<br>Klein M, Ponds RW, Houx PJ, et al. Effect of test duration on age-related differences in Stroop interference. J Clin Exp Neuropsychol 1997;19:77–82. |
| Synonyms                                                  | Select from among 5 words a synonym for a given word.                                                                                                                                                                                              | Lewerin, 2005 [79]                                                      | Dureman I, Salde H. Psykometriska och experimentopsykologiska metoder för klinisk tillämpning. (Psychometric and experimental psychological methods for clinical application.) Stockholm, Sweden: Almqvist & Wiksell, 1959 (in Swedish).             |
| Trail Making Test                                         | Part A: Connect randomly placed numbers (1-25) with a line as fast as possible in numeric order.<br>Part B: Connect randomly placed numbers (1-13) and letters (A-L) alternated with a line as fast as possible in numeric and alphabetical order. | Eussen, 2006 [87] (Part B)<br>van der Zwaluw, 2014 [82] (Part B/Part A) | Reitan R. Validity of the Trail Making Test as an indicator of organic brain damage. Percept Mot Skills 1958;8:271–6.                                                                                                                                |
| Verbal Fluency Test (VFT)                                 | Name as many words as possible starting with a particular letter (during a 1 minute period, 3 letters were given).                                                                                                                                 | van Uffelen, 2008 [83]<br>van der Zwaluw, 2014 [82]                     | Lezak MD. Neuropsychological assessment. 4th ed. New York: Oxford University Press, 2004.                                                                                                                                                            |
| Verbal Fluency Test (VFT),<br>Animals Named               | Name as many animals as possible (during a 1 minute period).                                                                                                                                                                                       | Eussen, 2006 [87]<br>Dangour, 2015 [72]                                 | Luteijn F vdPF. Handleiding Groninger Intelligentietest. (Manual Groningen Intelligence Test.) Lisse, Netherlands: Swets and Zeitlinger, 1983.<br>Goodglass H, Kaplan E. Assessment of dysphasia and                                                 |

| Test                                                            | Description                                                                                                                                                                                    | Author, year                                                                                                    | References                                                                                                                                                                                                                                                              |
|-----------------------------------------------------------------|------------------------------------------------------------------------------------------------------------------------------------------------------------------------------------------------|-----------------------------------------------------------------------------------------------------------------|-------------------------------------------------------------------------------------------------------------------------------------------------------------------------------------------------------------------------------------------------------------------------|
|                                                                 |                                                                                                                                                                                                |                                                                                                                 | related disorders. Philadelphia: Lea and Febiger; 1983.                                                                                                                                                                                                                 |
| Verbal Fluency Test (VFT), Letters                              | List as many nouns beginning with the letter P or G as possible (during a 2 minute period).                                                                                                    | Eussen, 2006 [87]                                                                                               | Luteijn F vdPF. Handleiding Groninger Intelligentietest. (Manual Groningen Intelligence Test.) Lisse, Netherlands: Swets and Zeitlinger, 1983.                                                                                                                          |
| <i>Cognitive Global</i>                                         |                                                                                                                                                                                                |                                                                                                                 |                                                                                                                                                                                                                                                                         |
| Alzheimer's Disease Assessment Scale (ADAS), Cognitive Subscale | 11-item version of the ADAS-cog measuring a range of cognitive functions, including memory, language, praxis, and attention.                                                                   | Ford, 2010 [77]                                                                                                 | Rosen WG, Mohs RC, Davis KL. A new rating scale for Alzheimer's disease. Am J Psychiatry 1984;141:1356 – 1364.                                                                                                                                                          |
| Cambridge Cognitive Examination (CAMCOG)                        | 60-item scale assessing a broad range of cognitive functions.                                                                                                                                  | Hvas, 2004 [73]                                                                                                 | Roth, M., Tym, E., Mountjoy, C.Q., Huppert, F.A., Hendrie, H., Verma, S.et al., 1986. CAMDEX. A standardised instrument for the diagnosis of mental disorder in the elderly with special reference to the early detection of dementia. Br. J. Psychiatry 149, 698– 709. |
| Clinical Dementia Rating (CDR), Sum of Boxes                    | Numeric scale used to quantify the severity of symptoms of dementia (six domains: memory, orientation, judgement and problem solving, community affairs, home and hobbies, and personal care). | Kwok, 2020 [86]                                                                                                 | Morris JC. 1993. The Clinical Dementia Rating (CDR): current version and scoring rules. Neurology 43: 2412–2414.                                                                                                                                                        |
| Mini-Mental State Examination (MMSE)                            | 11-item questionnaire measuring general cognitive function (5 domains: (1) orientation; (2) registration; (3) attention and calculation; (4) recall; (5) language).                            | Hvas, 2004 [73]<br>McMahon, 2006 [80]<br>van Uffelen, 2008 [83]<br>Ford, 2010 [77]<br>van der Zwaluw, 2014 [82] | Folstein MF, Folstein SE, McHugh PR. 1975. 'Mini-mental state'. A practical method for grading the cognitive state of patients for the clinician. J Psychiatr Res 12: 189–198.                                                                                          |
| Neuropsychological Test Battery, Total                          | executive (COWAT, CFT), memory (ISLT, CPAL), speed (SRT, CRT) -> average of the z-scores                                                                                                       | Kwok, 2017 [74]                                                                                                 | Shen JH, Shen Q, Yu H, Lai JS, Beaumont JL, Zhang Z, et al. Validation of an Alzheimer's disease assessment battery in Asian participants with mild to moderate Alzheimer's disease. Am J Neurodegener Dis 2014;3:158e69.                                               |

| Test                                                                                                                                                                                                              | Description                                                                                                                                                                                                                                          | Author, year                                                                                   | References                                                                                                                                                                                                                                                                                                                                                                                                                                                                                                          |
|-------------------------------------------------------------------------------------------------------------------------------------------------------------------------------------------------------------------|------------------------------------------------------------------------------------------------------------------------------------------------------------------------------------------------------------------------------------------------------|------------------------------------------------------------------------------------------------|---------------------------------------------------------------------------------------------------------------------------------------------------------------------------------------------------------------------------------------------------------------------------------------------------------------------------------------------------------------------------------------------------------------------------------------------------------------------------------------------------------------------|
| Telephone Interview for Cognitive Status–Modified (TICS-M) Total Cognitive Functioning Score                                                                                                                      | 13-item interview (modified version) assessing general cognition (4 domains: (1) orientation; (2) registration, recent memory and delayed recall (memory); (3) attention/calculation; (4) semantic memory, comprehension and repetition (language)). | Walker, 2012 [84]                                                                              | de Jager CA, Budge M, Clarke R. Utility of TICS-M for the assessment of cognitive function in older adults. <i>Int J Geriatr Psychiatry</i> 2003;18: 318–24.                                                                                                                                                                                                                                                                                                                                                        |
| <i>Cognitive Memory</i>                                                                                                                                                                                           |                                                                                                                                                                                                                                                      |                                                                                                |                                                                                                                                                                                                                                                                                                                                                                                                                                                                                                                     |
| 12 Words Learning Test, 15 min                                                                                                                                                                                    | 15 minutes after completion of the fourth learning trial. Recall as many words as possible.                                                                                                                                                          | Hvas, 2004 [73]                                                                                | Nielsen, H., Lolk, A., Krag-Sørensen, P., 1995. Normative data for eight neuropsychological tests, gathered from a random sample of Danes aged 64–83 years. <i>Nordisk Psykologi</i> 47, 241– 255.                                                                                                                                                                                                                                                                                                                  |
| 12 Words Learning Test, Immediate Recall                                                                                                                                                                          | 12 words will be read aloud at a rate of one word per second. Say as many of the words as possible in any order.                                                                                                                                     | Hvas, 2004 [73]                                                                                | Nielsen, H., Lolk, A., Krag-Sørensen, P., 1995. Normative data for eight neuropsychological tests, gathered from a random sample of Danes aged 64–83 years. <i>Nordisk Psykologi</i> 47, 241– 255.                                                                                                                                                                                                                                                                                                                  |
| 15 Word Learning Test, delayed recall<br>Rey Auditory Verbal Learning Test (RAVLT), Trial 7                                                                                                                       | Recall the words of the 15-word learning test in any order after 20 min.                                                                                                                                                                             | Eussen, 2006 [87]<br>McMahon, 2006 [80]                                                        | Saan RJ, Deelman BG. <i>De nieuwe 15-woordentest (A en B) een handleiding. (New 15-words test (A and B) a manual)</i> . Lisse, Netherlands: Swets & Zeitlinger, 1986.<br>Lezak MD. <i>Neuropsychological assessment</i> . 3rd ed. New York: Oxford University Press, 1995.                                                                                                                                                                                                                                          |
| 15 Word Learning Test, Immediate Recall<br>Rey Auditory Verbal Learning Test (RAVLT), Trial 1-5<br>Auditory Verbal Learning Test (AVLT), Trial 1-5<br>Rey Auditory Verbal Learning Test (RAVLT), Immediate Recall | Read 15 words 5 times and recall words in between readings in any order.                                                                                                                                                                             | Eussen, 2006 [87]<br>McMahon, 2006 [80]<br>van Uffelen, 2008 [83]<br>van der Zwaluw, 2014 [82] | Saan RJ, Deelman BG. <i>De nieuwe 15-woordentest (A en B) een handleiding. (New 15-words test (A and B) a manual)</i> . Lisse, Netherlands: Swets & Zeitlinger, 1986.<br>Lezak MD. <i>Neuropsychological assessment</i> . 3rd ed. New York: Oxford University Press, 1995.<br>Rey A. <i>L'examen clinique en psychologie</i> . Paris: Presses Universitaires de France, 1964.<br>Brand N, Jolles J. Learning and retrieval rate of words presented auditorily and visually. <i>J Gen Psychol</i> 1985; 112:201–210. |

| Test                                                                                                                       | Description                                                                                                                                                                                                                              | Author, year                                   | References                                                                                                                                                                                                                                                                                   |
|----------------------------------------------------------------------------------------------------------------------------|------------------------------------------------------------------------------------------------------------------------------------------------------------------------------------------------------------------------------------------|------------------------------------------------|----------------------------------------------------------------------------------------------------------------------------------------------------------------------------------------------------------------------------------------------------------------------------------------------|
| 15 Word Learning Test, recognition<br>Rey Auditory Verbal Learning Test (RAVLT), Recognition                               | Recognize the original 15 words of 30 words read.                                                                                                                                                                                        | Eussen, 2006 [87]<br>van der Zwaluw, 2014 [82] | Saan RJ, Deelman BG. De nieuwe 15-woordentest (A en B) een handleiding. (New 15-words test (A and B) a manual). Lisse, Netherlands: Swets & Zeitlinger, 1986.<br>Brand N, Jolles J. Learning and retrieval rate of words presented auditorily and visually. J Gen Psychol 1985; 112:201–210. |
| Auditory Verbal Learning Test (AVLT), Trial 6                                                                              | After five repetitions of free-recall, a second “interference” list (List B) will be presented in the same manner. Recall as many words from List B as possible. After the interference trial, recall immediately the words from List A. | van Uffelen, 2008 [83]                         | Rey A. L'examen clinique en psychologie. Paris: Presses Universitaires de France, 1964.                                                                                                                                                                                                      |
| California Verbal Learning Test (CVLT), Delayed Recall<br>California Verbal Learning Test (CVLT), A long-delay free recall | Recall the words of the 16-word learning test in any order after 20 min.                                                                                                                                                                 | Dangour, 2015 [72]<br>Ford, 2010 [77]          | Delis DC, Kramer JH, Kaplan E, Ober BA. California Verbal Learning Test. New York: Psychological Corporation; 1987.<br>Delis DC, Kramer JH, Kaplan E, Ober BA. California Verbal Learning Test, second edition, adult version. The Psychological Corporation; 2000.                          |
| California Verbal Learning Test (CVLT), Trial 1-3                                                                          | Read 16 words 3 times and recall words in between readings in any order.                                                                                                                                                                 | Dangour, 2015 [72]                             | Delis DC, Kramer JH, Kaplan E, Ober BA. California Verbal Learning Test. New York: Psychological Corporation; 1987.                                                                                                                                                                          |
| California Verbal Learning Test (CVLT), Trial 1-5                                                                          | Read 16 words 5 times and recall words in between readings in any order.                                                                                                                                                                 | Ford, 2010 [77]                                | Delis DC, Kramer JH, Kaplan E, Ober BA. California Verbal Learning Test, second edition, adult version. The Psychological Corporation; 2000.                                                                                                                                                 |
| Complex Figure of Rey, Delayed Recall                                                                                      | Draw the complex figure of Rey (a standard design of shapes and lines) without the example 30 min after seeing the copy                                                                                                                  | Eussen, 2006 [87]                              | Visser RSH. Manual of the Complex Figure Test. Lisse, Netherlands: Swets & Zeitlinger, 1985.                                                                                                                                                                                                 |
| Complex Figure of Rey, Immediate Recall                                                                                    | Draw the complex figure of Rey (a standard design of shapes and lines) without the example immediately after the copy                                                                                                                    | Eussen, 2006 [87]                              | Visser RSH. Manual of the Complex Figure Test. Lisse, Netherlands: Swets & Zeitlinger, 1985.                                                                                                                                                                                                 |
| Continuous Paired Associates Learning (CPAL)                                                                               | learn a series of associations between a set of simple shapes and their associated location                                                                                                                                              | Kwok, 2017 [74]<br>Kwok, 2020 [86]             | Bernbach, Harley A., and Gordon H. Bower. "Confidence ratings in continuous paired-associate                                                                                                                                                                                                 |



| Test                                                                         | Description                                                                                                                                                                                                                                                                                                              | Author, year                                                         | References                                                                                                                                                                                                                                                                                                  |
|------------------------------------------------------------------------------|--------------------------------------------------------------------------------------------------------------------------------------------------------------------------------------------------------------------------------------------------------------------------------------------------------------------------|----------------------------------------------------------------------|-------------------------------------------------------------------------------------------------------------------------------------------------------------------------------------------------------------------------------------------------------------------------------------------------------------|
|                                                                              |                                                                                                                                                                                                                                                                                                                          |                                                                      | learning." <i>Psychonomic Science</i> 21.4 (1970): 252-253.                                                                                                                                                                                                                                                 |
| Digit Cancellation Test (DCT)                                                | Detect and pencil out each target digit (1 digit for the first matrix, 2 for the second, and 3 for the third; each matrix within a 45 sec period).                                                                                                                                                                       | Ford, 2010 [77]                                                      | Spinnler H, Tognoni G. Standardizzazione e Taratura Italiana di Test Neuropsicologici. <i>Ital J Neurol Sci</i> 1987; 6(suppl 8):47–50.                                                                                                                                                                     |
| Digit Span Backward                                                          | Repeat a string of digits in reverse order                                                                                                                                                                                                                                                                               | Lewerin, 2005 [79]<br>Eussen, 2006 [87]<br>van der Zwaluw, 2014 [82] | Wechsler D. A standardized memory scale for clinical use. <i>J Psychol</i> 1945;19:87–95.<br>Wechsler D. Wechsler Memory Scale—revised manual. San Antonio, TX: Psychological Corporation, 1987.<br>Wechsler D. Manual for the Adult Intelligence Scale—Revised. New York: Psychological Corporation; 1981. |
| Digit Span Forward                                                           | Repeat a string of digits in original order                                                                                                                                                                                                                                                                              | Lewerin, 2005 [79]<br>Eussen, 2006 [87]<br>van der Zwaluw, 2014 [82] | Wechsler D. A standardized memory scale for clinical use. <i>J Psychol</i> 1945;19:87–95.<br>Wechsler D. Wechsler Memory Scale—revised manual. San Antonio, TX: Psychological Corporation, 1987.<br>Wechsler D. Manual for the Adult Intelligence Scale—Revised. New York: Psychological Corporation; 1981. |
| International Shopping List Test (ISLT)                                      | The International Shopping List Test (ISLT) is a four trial (three learning trials and one delayed recall trial) verbal list learning test in which individuals are instructed to remember a list of 12 items that they need to obtain from their local store (common shopping list items) (3x immediate, 30min delayed) | Kwok, 2017 [74]<br>Kwok, 2020 [86]                                   | Lim, Y. Y., Prang, K. H., Cysique, L., Pietrzak, R. H., Snyder, P. J., & Maruff, P. (2009). A method for cross-cultural adaptation of a verbal memory assessment. <i>Behavior Research Methods</i> , 41 (4), 1190–1200.                                                                                     |
| Telephone Interview for Cognitive Status–Modified (TICS-M), Delayed Recall   | Subtest of TICS-m with a 10-item non-semantically related word list. After 5 min: recall as many words as possible.                                                                                                                                                                                                      | Walker, 2012 [84]                                                    | de Jager CA, Budge M, Clarke R. Utility of TICS-M for the assessment of cognitive function in older adults. <i>Int J Geriatr Psychiatry</i> 2003;18: 318–24.                                                                                                                                                |
| Telephone Interview for Cognitive Status–Modified (TICS-M), Immediate Recall | Subtest of TICS-m with a 10-item non-semantically related word list. Recall as many words as possible.                                                                                                                                                                                                                   | Walker, 2012 [84]                                                    | de Jager CA, Budge M, Clarke R. Utility of TICS-M for the assessment of cognitive function in older adults. <i>Int J Geriatr Psychiatry</i> 2003;18: 318–24.                                                                                                                                                |

| Test                                  | Description                                                                                                                        | Author, year                          | References                                                                                                                                                                                                                                   |
|---------------------------------------|------------------------------------------------------------------------------------------------------------------------------------|---------------------------------------|----------------------------------------------------------------------------------------------------------------------------------------------------------------------------------------------------------------------------------------------|
| Thurstone's Picture Memory Test       | 28 pictures will be shown consecutively at a rate of every 5 sec. Identify the picture among 4 similar pictures.                   | Lewerin, 2005 [79]                    | Thurstone LL. Primary mental abilities. Psychometric monographs. Chicago, IL: University of Chicago Press, 1938:5.                                                                                                                           |
| Visual Reproduction                   | 4 drawings will be shown to remember. Reproduce all drawings.                                                                      | Lewerin, 2005 [79]                    | Wechsler D. A standardized memory scale for clinical use. J Psychol 1945;19:87-95.                                                                                                                                                           |
| Wechsler Paragraph Recall Test        | Immediate verbal recall of a standard paragraph length passage of text.                                                            | McMahon, 2006 [80]                    | Wechsler D. Wechsler Memory Scale: manual. 3rd ed. San Antonio, Tex.: Psychological Corporation, 1997.                                                                                                                                       |
| <i>Cognitive Speed</i>                |                                                                                                                                    |                                       |                                                                                                                                                                                                                                              |
| Digit Symbol                          | Replace digits with symbols according to the existing code during a 90 sec period.                                                 | Lewerin, 2005 [79]                    | Wechsler D. The measurement and appraisal of adult intelligence. Baltimore, MD: Williams & Wilkins; 1958.                                                                                                                                    |
| Digit Symbol Substitution Test (DSST) | Nine symbols corresponding with nine digits. Draw symbols corresponding to the digits below numbered boxes during a 90 sec period. | van Uffelen, 2008 [83]                | Uiterwijk JM. WAIS-III-NL/V. Lisse: Swets & Zeitlinger, 2001.                                                                                                                                                                                |
| Finger Tapping                        | Press a single button as many times as possible within 30 sec.                                                                     | Eussen, 2006 [87]                     | Houx P. Cognitive aging and health-related factors. Maastricht, Netherlands: Maastricht University, 1991:113-21.                                                                                                                             |
| Identical Forms                       | Mark the complex figure with the same from within a group of 5 different figures.                                                  | Lewerin, 2005 [79]                    | Dureman I, Sa"lde H. Psykometriska och experimentalpsykologiska metoder f"or klinisk till"ampning. (Psychometric and experimental psychological methods for clinical application.) Stockholm, Sweden: Almqvist & Wiksell, 1959 (in Swedish). |
| Motor Planning 2                      | Press a lit button out of 3 buttons as quickly as possible.                                                                        | Eussen, 2006 [87]                     | Houx P. Cognitive aging and health-related factors. Maastricht, Netherlands: Maastricht University, 1991:113-21.                                                                                                                             |
| Reaction Time, Choice                 | Electronic reaction timer providing single challenges.                                                                             | Dangour, 2015 [72]<br>Kwok, 2017 [74] | Cox BD, Huppert FA, Whichelow MJ. The Health and Lifestyle Survey: seven years on. Aldershot (United Kingdom): Dartmouth Publishing; 1993.                                                                                                   |

| Test                                    | Description                                                                                                                                                                                                                                                                    | Author, year                                                                                    | References                                                                                                                                                                                                                             |
|-----------------------------------------|--------------------------------------------------------------------------------------------------------------------------------------------------------------------------------------------------------------------------------------------------------------------------------|-------------------------------------------------------------------------------------------------|----------------------------------------------------------------------------------------------------------------------------------------------------------------------------------------------------------------------------------------|
| Reaction Time, Simple                   | Electronic reaction timer providing multiple challenges.                                                                                                                                                                                                                       | Dangour, 2015 [72]<br>Kwok, 2017 [74]                                                           | Cox BD, Huppert FA, Whichelow MJ. The Health and Lifestyle Survey: seven years on. Aldershot (United Kingdom): Dartmouth Publishing; 1993.                                                                                             |
| Stroop Color-Word Test                  | Task 1: Read the color name given in black ink.<br>Task 2: Name the colored rectangles.<br>Task 3: Name the ink color of the printed words rather than the word                                                                                                                | van der Zwaluw, 2014 [82]                                                                       | Stroop J. Studies of interference in serial verbal reactions. J Exp Psychol 1935;18:643–662.                                                                                                                                           |
| Symbol Digit Modalities Test            | 9 abstract symbols corresponding to numbers 1-9. Step 1: write correct number under each symbol during a 90 sec period. Step 2: say correct number to each symbol during a 90 sec period (oral version). Step 3: draw correct symbol under each number during a 90 sec period. | van der Zwaluw, 2014 [82]                                                                       | Smith A. Symbol Digits Modalities Test. Los Angeles: Western Psychological Services; 1982.                                                                                                                                             |
| Symbol Letter Modality                  | 9 abstract symbols corresponding to numbers 1-9. Say correct number to each symbol during a 90 sec period (oral version).                                                                                                                                                      | Dangour, 2015 [72]                                                                              | Smith A. Symbol letter modalities test. Revised manual. Los Angeles (CA): Western Psychological Services; 1982.                                                                                                                        |
| Trail Making Test                       | Part A: Connect randomly placed numbers (1-25) with a line as fast as possible in numeric order.<br>Part B: Connect randomly placed numbers (1-13) and letters (A-L) alternated with a line as fast as possible in numeric and alphabetical order.                             | Eussen, 2006 [87] (Part A)<br>McMahon, 2006 [80] (Part B)<br>van der Zwaluw, 2014 [82] (Part A) | Reitan R. Validity of the Trail Making Test as an indicator of organic brain damage. Percept Mot Skills 1958;8: 271–276.<br>Reitan RM. The relation of the Trail Making Test to organic brain damage. J Consult Psychol 1955;19:393-4. |
| <i>Depression</i>                       |                                                                                                                                                                                                                                                                                |                                                                                                 |                                                                                                                                                                                                                                        |
| Beck Depression Inventory (BDI)         | Patient self-reported 21-item questionnaire to measure severity of depression.                                                                                                                                                                                                 | Ford, 2008 [78]                                                                                 | Beck AT, Ward CH, Mendelson M, et al. An inventory for measuring depression. Arch Gen Psychiatry 1961;4:561–571                                                                                                                        |
| Hamilton Depression Rating Scale (HDRS) | Clinician-administered questionnaire to measure severity of depressive symptoms. It consists of 17 items.                                                                                                                                                                      | Kwok, 2020 [86]                                                                                 | Hamilton, M. (1967) Development of a rating scale for primary depressive illness. British Journal of Social and Clinical Psychology; 6(4):278-96.                                                                                      |

| Test                                       | Description                                                                                                                  | Author, year                                | References                                                                                                                                                                                                                                                  |
|--------------------------------------------|------------------------------------------------------------------------------------------------------------------------------|---------------------------------------------|-------------------------------------------------------------------------------------------------------------------------------------------------------------------------------------------------------------------------------------------------------------|
| Kessler Psychological Distress Scale (K10) | Patient self-reported 10-item questionnaire to measure psychological distress (anxiety and depressive symptoms).             | Christensen, 2011 [75]                      | Kessler, R., Andrews, G., Colpe, L., Hiripi, E., Mroczek, D., Normand, S., et al., 2002. Short screening scales to monitor population prevalences and trends in non-specific psychological distress. <i>Psychol. Med.</i> 32 (6), 959–976.                  |
| Major Depression Inventory (MDI)           | Patient self-reported 12-item questionnaire to measure DSM-IV and ICD-10 diagnosis of depression and severity of depression. | Hvas, 2004 [73]                             | Bech, P., Rasmussen, N.A., Olsen, L.R., Noerholm, V., Abildgaard, W., 2001. The sensitivity and specificity of the major depression inventory, using the present state examination as the index diagnostic validity. <i>J. Affect. Disord.</i> 66, 159–164. |
| Patient Health Questionnaire 9 (PHQ-9)     | Patient self-reported 9-item questionnaire to measure presence and severity of depression.                                   | Walker, 2010 [85]<br>Christensen, 2011 [75] | Spitzer, R., Kroenke, K., Williams, J., 1999. Validation and utility of a self-report version of PRIME-MD—the PHQ primary care study. <i>JAMA</i> 282 (18), 1737–1744.                                                                                      |
| SF-12 Mental Component Summary (MCS) Score | Patient self-reported 6-item questionnaire (part of SF-12) to measure depressive disorders.                                  | de Koning, 2016 [76]                        | Ware, J.; Kosinski, M.; Keller, S.D. A 12-Item Short-Form Health Survey: Construction of scales and preliminary tests of reliability and validity. <i>Med. Care</i> 1996, 34, 220–233.                                                                      |
| <i>Fatigue</i>                             |                                                                                                                              |                                             |                                                                                                                                                                                                                                                             |
| SF-36 Vitality                             | Patient self-reported 4-item questionnaire (part of SF-36) to measure vitality (energy level and fatigue).                   | Schlichtiger, 1996 [81]                     | Ware JE, Snow KK, Kosinski M, Gandek B (1993) <i>Sf-36 health survey: manual and interpretation guide</i> . The Health Institute, New England Medical Center, Boston                                                                                        |

**Supplement Table S3: Reasons for exclusion after full text analysis**

| <b>Author, year</b>    | <b>Reason for exclusion</b>     |
|------------------------|---------------------------------|
| Almeida, 2014          | Patient population (depression) |
| Bjorkegren, 1999       | No RCT                          |
| Brito, 2017            | No outcomes of interest         |
| Christen, 2018         | No outcomes of interest         |
| De Jager, 2012         | Only subgroup analyses          |
| Den Heijer, 2007       | No outcomes of interest         |
| Dhonukshe-Rutten, 2005 | No outcomes of interest         |
| Djokic, 2017           | Multivitamin supplement         |
| Ellis, 1973            | High risk of bias               |
| Flicker, 2006          | No outcomes of interest         |
| Garcia, 2004           | Population n < 40               |
| Hill, 2013             | No outcomes of interest         |
| Huang, 1999            | Letter to the editor            |
| Jiang B, 2013          | Patient population (stroke)     |
| Jiang Y, 2013          | Congress abstract               |
| Kang, 2008             | Patient population (CVD)        |
| Kurt, 2010             | No outcomes of interest         |
| Lewerin, 2003          | No outcomes of interest         |
| Lorenzl, 2008          | No RCT                          |
| McMahon, 2007          | No outcomes of interest         |
| Miles, 2017            | No outcomes of interest         |
| Naurath, 1995          | No outcomes of interest         |

| <b>Author, year</b>   | <b>Reason for exclusion</b> |
|-----------------------|-----------------------------|
| Nct, 2010             | Trial registration          |
| Okereke, 2015         | Patient population (CVD)    |
| Oulhaj, 2016          | Only subgroup analyses      |
| Rietsema, 2014        | Case report                 |
| Rosenberg, 2008       | No RCT                      |
| Shahab-Ferdows, 2012  | No outcomes of interest     |
| Smith, 2010           | No outcomes of interest     |
| Stott, 2005           | Patient population (CVD)    |
| Swart, 2016           | No outcomes of interest     |
| Van Campen, 2019      | No RCT                      |
| Van Der Zwaluw, 2013  | Congress abstract           |
| Van Uffelen, 2007     | No outcomes of interest     |
| Van Uffelen, 2010     | Congress abstract           |
| Van Wijngaarden, 2014 | No outcomes of interest     |
| Winkels, 2008         | No outcomes of interest     |

**Supplement Table S4: Additional patient characteristics at baseline of included studies**

| Author, year           | Group           | Participants, n | Female, n (%) | Mean age (SD), years          | Mean MMSE (SD)                | Mean Holotranscobalamin (SD), (pmol/L) | Mean MMA (SD), (µmol/L)    | Mean homocysteine (SD), (µmol/L) |
|------------------------|-----------------|-----------------|---------------|-------------------------------|-------------------------------|----------------------------------------|----------------------------|----------------------------------|
| <i>B12 alone</i>       |                 |                 |               |                               |                               |                                        |                            |                                  |
| Dangour, 2015 [72]     | I               | 99              | 54 (54.5)     | 79.9 (3.5)                    | 29.0 [28.0-29.0] <sup>a</sup> | 50.4 [38.2-68.3] <sup>a</sup>          | n.r.                       | 15.9 [14.0-18.9] <sup>a</sup>    |
|                        | P               | 102             | 52 (51.0)     | 80.1 (3.7)                    | 29.0 [28.0-29.0] <sup>a</sup> | 48.8 [39.8-62.9] <sup>a</sup>          | n.r.                       | 16.3 [13.3-19.9] <sup>a</sup>    |
| Eussen, 2006 [87]      | I               | 64              | 49 (76.6)     | 82.0 (5.0)                    | 26.7 (3.1)                    | 58.0 (21.0)                            | 0.5 (0.4)                  | 15.6 (6.6)                       |
|                        | P               | 65              | 51 (78.5)     | 82.0 (5.0)                    | 26.8 (2.9)                    | 70.0 (39.0)                            | 0.5 (0.3)                  | 15.8 (5.6)                       |
| Hvas, 2004 [73]        | I               | 70              | 50 (71.4)     | 75.0 [19.0-92.0] <sup>b</sup> | 26.0 [n.r.] <sup>a</sup>      | n.r.                                   | 0.5 [0.3-2.0] <sup>a</sup> | 13.5 [5.3-46.6] <sup>a</sup>     |
|                        | P               | 70              | 48 (68.6)     | 74.0 [33.0-88.0] <sup>b</sup> | 27.0 [n.r.] <sup>a</sup>      | n.r.                                   | 0.5 [0.3-1.3] <sup>a</sup> | 12.8 [5.8-31.3] <sup>a</sup>     |
| Kwok, 2017 [74]        | I               | 137             | 55 (40.0)     | 74.7 (4.0)                    | 25.3 (3.8)                    | 65.1 (28.6)                            | 0.3 (0.2)                  | 16.5 (5.4)                       |
|                        | P               | 134             | 58 (43.3)     | 75.8 (4.2)                    | 25.2 (3.4)                    | 66.8 (24.6)                            | 0.2 (0.2)                  | 17.1 (5.9)                       |
| <i>B complex</i>       |                 |                 |               |                               |                               |                                        |                            |                                  |
| Christensen, 2011 [75] | I1 <sup>c</sup> | 109             | 72 (66.1)     | 65.8 (4.1)                    | n.r.                          | n.r.                                   | n.r.                       | n.r.                             |
|                        | P1 <sup>c</sup> | 100             | 63 (63.0)     | 66.0 (4.2)                    | n.r.                          | n.r.                                   | n.r.                       | n.r.                             |
|                        | I2              | 338             | 194 (57.4)    | 66.0 (4.4)                    | n.r.                          | n.r.                                   | n.r.                       | n.r.                             |
|                        | P2              | 353             | 207 (58.6)    | 65.97 (4.2)                   | n.r.                          | n.r.                                   | n.r.                       | n.r.                             |
| de Koning, 2016 [76]   | I               | 1461            | 736 (50.4)    | 73.0 [69.0-78.0] <sup>a</sup> | 28.0 [27.0-29.0] <sup>a</sup> | 65.0 [48.0-86.0] <sup>a</sup>          | 0.2 [0.2-0.3] <sup>a</sup> | 14.3 [13.0-16.5] <sup>a</sup>    |
|                        | P               | 1458            | 724 (49.7)    | 73.0 [69.0-78.0] <sup>a</sup> | 28.0 [27.0-29.0] <sup>a</sup> | 63.0 [45.0-84.0] <sup>a</sup>          | 0.2 [0.2-0.3] <sup>a</sup> | 14.5 [13.0-16.7] <sup>a</sup>    |

| Author, year              | Group | Participants, n | Female, n (%) | Mean age (SD), years          | Mean MMSE (SD)                | Mean Holotranscobalamin (SD), (pmol/L) | Mean MMA (SD), (μmol/L)    | Mean homocysteine (SD), (μmol/L) |
|---------------------------|-------|-----------------|---------------|-------------------------------|-------------------------------|----------------------------------------|----------------------------|----------------------------------|
| Eussen, 2006 [87]         | I     | 66              | 49 (74.2)     | 83.0 (6.0)                    | 26.7 (3.0)                    | 68.0 (33.0)                            | 0.4 (0.2)                  | 14.5 (4.4)                       |
|                           | P     | 65              | 51 (78.5)     | 82.0 (5.0)                    | 26.8 (2.9)                    | 70.0 (39.0)                            | 0.5 (0.3)                  | 15.8 (5.6)                       |
| Ford, 2008 [78]           | I     | 150             | 0 (0.0)       | 79.3 (2.7)                    | 27.5 (1.8)                    | n.r.                                   | n.r.                       | n.r.                             |
|                           | P     | 149             | 0 (0.0)       | 78.7 (2.7)                    | 27.6 (1.9)                    | n.r.                                   | n.r.                       | n.r.                             |
| Ford, 2010 [77]           | I     | 150             | 0 (0.0)       | 79.3 (2.7)                    | 27.5 (1.8)                    | n.r.                                   | n.r.                       | 14.0 (6.5)                       |
|                           | P     | 149             | 0 (0.0)       | 78.7 (2.7)                    | 27.6 (1.9)                    | n.r.                                   | n.r.                       | 13.1 (3.8)                       |
| Kwok, 2020 [86]           | I     | 138             | 51 (37.0)     | 76.9 (5.4)                    | 26.0 (3.1)                    | 85.5 (29.8)                            | n.r.                       | 13.8 (3.4)                       |
|                           | P     | 141             | 62 (44.0)     | 78.0 (5.3)                    | 25.7 (3.0)                    | 85.8 (32.9)                            | n.r.                       | 13.8 (3.0)                       |
| Lewerin, 2005 [79]        | I     | 126             | 78 (62.0)     | 75.7 (4.7)                    | n.r.                          | n.r.                                   | 0.2 (0.1)                  | 17.8 (5.5)                       |
|                           | P     | 69              | 39 (56.0)     | 75.6 (4.0)                    | n.r.                          | n.r.                                   | 0.2 (0.1)                  | 16.1 (4.5)                       |
| McMahon, 2006 [80]        | I     | 138             | 65 (52.0)     | 73.6 (5.8)                    | 29.2 (1.0)                    | n.r.                                   | n.r.                       | 16.8 (5.4)                       |
|                           | P     | 138             | 47 (37.0)     | 73.4 (5.7)                    | 29.2 (1.1)                    | n.r.                                   | n.r.                       | 16.3 (4.4)                       |
| Schlichtiger, 1996 [81]   | I     | 110             | 76 (69.1)     | 73.3 (5.2)                    | n.r.                          | n.r.                                   | n.r.                       | 15.2 (5.2)                       |
|                           | P     | 103             | 74 (71.8)     | 73.3 (5.9)                    | n.r.                          | n.r.                                   | n.r.                       | 16.3 (6.0)                       |
| van der Zwaluw, 2014 [82] | II    | 1461            | 736 (50.4)    | 73.0 [69.0-78.0] <sup>a</sup> | 28.0 [27.0-29.0] <sup>a</sup> | 65.0 [48.0-86.0] <sup>a</sup>          | 0.2 [0.2-0.3] <sup>a</sup> | 14.3 [13.0-16.5] <sup>a</sup>    |
|                           | P1    | 1458            | 724 (49.7)    | 73.0 [69.0-78.0] <sup>a</sup> | 28.0 [27.0-29.0] <sup>a</sup> | 63.0 [45.0-84.0] <sup>a</sup>          | 0.2 [0.2-0.3] <sup>a</sup> | 14.5 [13.0-16.7] <sup>a</sup>    |



| Author, year           | Group           | Participants, n | Female, n (%) | Mean age (SD), years | Mean MMSE (SD)                | Mean Holotrans-cobalamin (SD), (pmol/L) | Mean MMA (SD), (μmol/L)    | Mean homocysteine (SD), (μmol/L) |
|------------------------|-----------------|-----------------|---------------|----------------------|-------------------------------|-----------------------------------------|----------------------------|----------------------------------|
|                        | I2 <sup>d</sup> | 425             | 181 (42.6)    | n.r.                 | 29.0 [27.0-30.0] <sup>a</sup> | 59.0 [46.0-78.0] <sup>a</sup>           | 0.2 [0.2-0.3] <sup>a</sup> | 14.0 [12.9-16.2] <sup>a</sup>    |
|                        | P2 <sup>d</sup> | 431             | 176 (40.8)    | n.r.                 | 29.0 [28.0-30.0] <sup>a</sup> | 60.0 [42.0-80.0] <sup>a</sup>           | 0.2 [0.2-0.3] <sup>a</sup> | 14.4 [12.9-16.4] <sup>a</sup>    |
| van Uffelen, 2008 [83] | I               | 90              | 34 (43.6)     | 75.4 (n.a.)          | n.a.                          | n.r.                                    | n.r.                       | n.r.                             |
|                        | P               | 89              | 33 (44.6)     | 74.9 (n.a.)          | n.a.                          | n.r.                                    | n.r.                       | n.r.                             |
| Walker, 2010 [85]      | I               | 447             | 266 (59.5)    | 65.9 (4.3)           | n.r.                          | n.r.                                    | n.r.                       | 9.6 (2.6)                        |
|                        | P               | 453             | 276 (60.9)    | 66.0 (4.2)           | n.r.                          | n.r.                                    | n.r.                       | 9.8 (2.8)                        |
| Walker, 2012 [84]      | I               | 447             | 266 (59.5)    | 65.9 (4.3)           | n.r.                          | n.r.                                    | n.r.                       | 9.6 (2.6)                        |
|                        | P               | 453             | 276 (60.9)    | 66.0 (4.2)           | n.r.                          | n.r.                                    | n.r.                       | 9.8 (2.8)                        |

MMA, Methylmalonic Acid; MMSE, Mini-Mental State Examination; n.a., not applicable; n.r., not reported

<sup>a</sup> median [IQR]; <sup>b</sup> median [range]; <sup>c</sup> with antidepressant; <sup>d</sup> extensive cognitive tests subsample

**Supplement Table S5: Study characteristics**

| Author, year       | Study location, country                                                                                                                                                                                                 | Inclusion                                                                                                                                                                                                                                                                                                                                                                                                                                                                                                                                                                                  | Exclusion                                                                                                                                                                                                                                                                                                                                                                                                                                                                                                                                                                                                                                                                                                                                    |
|--------------------|-------------------------------------------------------------------------------------------------------------------------------------------------------------------------------------------------------------------------|--------------------------------------------------------------------------------------------------------------------------------------------------------------------------------------------------------------------------------------------------------------------------------------------------------------------------------------------------------------------------------------------------------------------------------------------------------------------------------------------------------------------------------------------------------------------------------------------|----------------------------------------------------------------------------------------------------------------------------------------------------------------------------------------------------------------------------------------------------------------------------------------------------------------------------------------------------------------------------------------------------------------------------------------------------------------------------------------------------------------------------------------------------------------------------------------------------------------------------------------------------------------------------------------------------------------------------------------------|
| <i>B12 alone</i>   |                                                                                                                                                                                                                         |                                                                                                                                                                                                                                                                                                                                                                                                                                                                                                                                                                                            |                                                                                                                                                                                                                                                                                                                                                                                                                                                                                                                                                                                                                                                                                                                                              |
| Dangour, 2015 [72] | General practices (n=7) in South East England that were members of the Medical Research Council General Practice Research Framework or the National Institute of Health Research Primary Care Research Network, England | <ul style="list-style-type: none"> <li>• Mini-Mental State Examination score <math>\geq 24</math></li> <li>• moderate vitamin B-12 deficiency who did not have anemia (serum vitamin B-12 concentrations <math>\geq 107</math> and <math>&lt; 210</math> pmol/L [Beckman Coulter assay] and hemoglobin concentrations <math>\geq 110</math> g/L for women and <math>\geq 120</math> g/L for men)</li> </ul>                                                                                                                                                                                | <ul style="list-style-type: none"> <li>• current consumption of vitamin B-12 supplements</li> <li>• received a vitamin B-12 injection in the previous 6 mo</li> <li>• very-low vitamin B-12 concentrations (<math>&lt; 107</math> pmol/L, which is a cutoff typically used for deficiency; Beckman Coulter assay, Beckman Coulter Inc.)</li> <li>• anemia (hemoglobin concentration <math>&lt; 110</math> g/L for women and <math>&lt; 120</math> g/L for men)</li> <li>• diabetes, dementia, epilepsy, alcohol addiction, pacemakers and implanted metallic devices, previous pernicious anemia</li> <li>• residents of nursing homes</li> </ul>                                                                                            |
| Eussen, 2006 [87]  | n.r., the Netherlands                                                                                                                                                                                                   | <ul style="list-style-type: none"> <li>• mild vitamin B-12 deficiency was defined as               <ol style="list-style-type: none"> <li>1) a serum vitamin B-12 concentration between 100 and 200 pmol/L, or</li> <li>2) a serum vitamin B-12 concentration between 200 and 300 pmol/L, a plasma MMA concentration <math>\geq 0.32</math> mol/L, and a serum creatinine concentration <math>\leq 120</math> mol/L, the latter intended to exclude severe impairment of renal function</li> </ol> </li> <li>• Mini-Mental State Examination (MMSE) <math>\geq 19</math> points</li> </ul> | <ul style="list-style-type: none"> <li>• history of cobalamin deficiency, use of cobalamin (<math>&gt; 50</math> <math>\mu\text{g/d}</math>) or folic acid (<math>&gt; 200</math> <math>\mu\text{g/d}</math>) supplementation or injections</li> <li>• surgery or diseases of the stomach or small intestine, anemia, dementia, life-threatening diseases, or severe hearing or visual problems</li> <li>• ingested <math>&lt; 90\%</math> of the placebo or if MMSE was <math>&lt; 19</math> points (after 2 wk run-in period)</li> </ul>                                                                                                                                                                                                   |
| Hvas, 2004 [73]    | Aarhus University Hospital, Denmark                                                                                                                                                                                     | <ul style="list-style-type: none"> <li>• mildly to modestly increased P-MMA (0.40–2.00 <math>\mu\text{mol/L}</math>)</li> <li>• not previously treated with vitamin B12</li> </ul>                                                                                                                                                                                                                                                                                                                                                                                                         | <ul style="list-style-type: none"> <li>• P-MMA <math>&gt; 2.00</math> <math>\mu\text{mol}</math> (n=5)</li> <li>• blood hemoglobin <math>\leq 6.0</math> mmol/L and erythrocyte mean cell volume <math>\geq 110</math> fL (n=0)</li> <li>• blood hemoglobin <math>\leq 6.0</math> mmol/L and plasma ferritin <math>\leq 10</math> <math>\mu\text{g/L}</math> (males) or <math>\leq 8</math> <math>\mu\text{g/L}</math> (females; n=0)</li> <li>• plasma thyroid-stimulating hormone <math>\geq 4.1</math> mIU/L (n=6)</li> <li>• plasma creatinine <math>&gt; 120</math> <math>\mu\text{mol/L}</math> (females) or <math>&gt; 133</math> mmol/L (males; n=41)</li> <li>• incapacity to give informed consent, non-Danish speaking</li> </ul> |

| Author, year           | Study location, country                                                                                                                                                         | Inclusion                                                                                                                                                                                                                                                                                                                                                                                                                                                                                                                                                                                                                                                                          | Exclusion                                                                                                                                                                                                                                                                                                                                                                                                  |
|------------------------|---------------------------------------------------------------------------------------------------------------------------------------------------------------------------------|------------------------------------------------------------------------------------------------------------------------------------------------------------------------------------------------------------------------------------------------------------------------------------------------------------------------------------------------------------------------------------------------------------------------------------------------------------------------------------------------------------------------------------------------------------------------------------------------------------------------------------------------------------------------------------|------------------------------------------------------------------------------------------------------------------------------------------------------------------------------------------------------------------------------------------------------------------------------------------------------------------------------------------------------------------------------------------------------------|
|                        |                                                                                                                                                                                 |                                                                                                                                                                                                                                                                                                                                                                                                                                                                                                                                                                                                                                                                                    | <ul style="list-style-type: none"> <li>• life-threatening disease, hypersensitivity to cyanocobalamin, treatment with anticoagulants, Leber hereditary optic neuropathy, tobacco-alcohol amblyopia, tropical atoxic neuropathy, deafness or severe visual impairment, severe aphasia, current participation in another clinical trial</li> </ul>                                                           |
| Kwok, 2017 [74]        | Medical/diabetic clinics in Prince of Wales Hospital (PWH) and the seven Family Medicine/general outpatient clinics in the New Territories East cluster in Hong Kong, Hong Kong | <ul style="list-style-type: none"> <li>• diabetic people aged 70 years or older with plasma vitamin B12 150-300 pmol/L</li> </ul>                                                                                                                                                                                                                                                                                                                                                                                                                                                                                                                                                  | <ul style="list-style-type: none"> <li>• dementia or peripheral neuropathy or anemia, disabling stroke, renal failure, clinical depression, positive intrinsic factor antibody</li> <li>• current consumption of vitamin B12 supplements or centrally acting medications</li> <li>• no family member who could reliably inform on cognitive functioning (personal contact at least once a week)</li> </ul> |
| <i>B complex</i>       |                                                                                                                                                                                 |                                                                                                                                                                                                                                                                                                                                                                                                                                                                                                                                                                                                                                                                                    |                                                                                                                                                                                                                                                                                                                                                                                                            |
| Christensen, 2011 [75] | Australia                                                                                                                                                                       | <ul style="list-style-type: none"> <li>• elevated psychological distress as assessed by the K10 with scores 16 or greater (scores &lt;16 indicate no or low levels of psychological distress)</li> <li>• did not engage in physical activity at public health recommended levels as indicated by International Physical Activity Questionnaire (IPAQ) scores</li> <li>• did not take folic acid, vitamin B12 or vitamin B complex supplements</li> <li>• had no history of dementia, bipolar disorder or current suicide risk</li> <li>• had competent literacy skills</li> <li>• did not have a medical condition that would contraindicate exercise or folic acid use</li> </ul> | <ul style="list-style-type: none"> <li>• high likelihood of a depressive disorder with K10 scores of 30 or greater</li> <li>• low levels of red cell folate (&lt;250 nmol/l) and vitamin B12 (&lt;130 nmol/l)</li> <li>• abnormal thyroid-stimulating hormone levels (0.35–5.0 mu/l)</li> </ul>                                                                                                            |
| de Koning, 2016 [76]   | Erasmus Medical Center (EMC, Rotterdam), VU University Medical Center (VUmc,                                                                                                    | <ul style="list-style-type: none"> <li>• men and women aged 65 years and older</li> <li>• independently living or institutionalized</li> <li>• compliance for tablet intake of &gt; 85% 4-6 weeks prior to start of the trial</li> </ul>                                                                                                                                                                                                                                                                                                                                                                                                                                           | <ul style="list-style-type: none"> <li>• immobilization: being bedridden or wheelchair bound</li> <li>• cancer diagnosis within the last 5 year, except skin cancer as basal cell carcinoma and squamous cell carcinoma</li> <li>• serum creatinine level &gt;150 µmol/L</li> </ul>                                                                                                                        |

| Author, year      | Study location, country                                                             | Inclusion                                                                                                                                                                                                  | Exclusion                                                                                                                                                                                                                                                                                                                                                                                                                                                                                                                                    |
|-------------------|-------------------------------------------------------------------------------------|------------------------------------------------------------------------------------------------------------------------------------------------------------------------------------------------------------|----------------------------------------------------------------------------------------------------------------------------------------------------------------------------------------------------------------------------------------------------------------------------------------------------------------------------------------------------------------------------------------------------------------------------------------------------------------------------------------------------------------------------------------------|
|                   | Amsterdam) and Wageningen University (WU, Wageningen), Netherlands                  | <ul style="list-style-type: none"> <li>• competent to make own decisions</li> <li>• elevated homocysteine level (<math>\geq 12 \mu\text{mol/L}</math> and <math>\leq 50 \mu\text{mol/L}</math>)</li> </ul> | <ul style="list-style-type: none"> <li>• current or recent (&lt;4 months) use of supplements with very high doses of vitamin B12 (intramuscular injections) or folic acid (&gt;300 <math>\mu\text{g}</math>)</li> <li>• participation in other intervention studies</li> </ul>                                                                                                                                                                                                                                                               |
| Eussen, 2006 [87] | <i>See at B12 alone</i>                                                             | <i>See at B12 alone</i>                                                                                                                                                                                    | <i>See at B12 alone</i>                                                                                                                                                                                                                                                                                                                                                                                                                                                                                                                      |
| Ford, 2008 [78]   | Perth, Western Australia                                                            | <ul style="list-style-type: none"> <li>• men aged 75 years and older</li> <li>• being treated for, or had a history of, hypertension</li> </ul>                                                            | <ul style="list-style-type: none"> <li>• Beck Depression Inventory (BDI) score of 18 or higher</li> <li>• significant cognitive impairment as evidenced by a Mini-Mental State Examination (MMSE) score of less than 24 points</li> <li>• illness deemed likely to cause severe disability or death within 12 months (for example, metastatic cancer, Parkinson's disease, or history of stroke)</li> <li>• living in residential care facilities</li> <li>• non-English speakers</li> <li>• already taking vitamin B supplements</li> </ul> |
| Ford, 2010 [77]   | Perth, Western Australia                                                            | <ul style="list-style-type: none"> <li>• men aged 75 years and older</li> <li>• being treated for, or had a history of, hypertension</li> </ul>                                                            | <ul style="list-style-type: none"> <li>• Beck Depression Inventory (BDI) score of 18 or higher</li> <li>• significant cognitive impairment as evidenced by a Mini-Mental State Examination (MMSE) score of less than 24 points</li> <li>• illness deemed likely to cause severe disability or death within 12 months (for example, metastatic cancer, Parkinson's disease, or history of stroke)</li> <li>• living in residential care facilities</li> <li>• non-English speakers</li> <li>• already taking vitamin B supplements</li> </ul> |
| Kwok, 2020 [86]   | Specialist medical outpatient clinics in Prince of Wales Hospital, Hong Kong, China | <ul style="list-style-type: none"> <li>• people aged 65 years or more</li> <li>• Montreal cognitive assessment (MoCA) test (Hong Kong version) score lower than 22</li> </ul>                              | <ul style="list-style-type: none"> <li>• serum homocysteine less than 10 <math>\text{mmol/L}</math></li> <li>• dementia, peripheral neuropathy, clinical depression, renal failure, anemia, disabling stroke</li> <li>• receiving centrally acting medications or B vitamins supplementation</li> </ul>                                                                                                                                                                                                                                      |

| Author, year              | Study location, country                                              | Inclusion                                                                                                                                                                                                                                                                                                     | Exclusion                                                                                                                                                                                                                                                                                                                                                                                                                                                                                                                                                        |
|---------------------------|----------------------------------------------------------------------|---------------------------------------------------------------------------------------------------------------------------------------------------------------------------------------------------------------------------------------------------------------------------------------------------------------|------------------------------------------------------------------------------------------------------------------------------------------------------------------------------------------------------------------------------------------------------------------------------------------------------------------------------------------------------------------------------------------------------------------------------------------------------------------------------------------------------------------------------------------------------------------|
|                           |                                                                      |                                                                                                                                                                                                                                                                                                               | <ul style="list-style-type: none"> <li>• no reliable caregiver or family member who was able to regularly inform on cognitive functioning (at least one personal contact each week)</li> </ul>                                                                                                                                                                                                                                                                                                                                                                   |
| Lewerin, 2005 [79]        | Göteborg, Sweden                                                     | <ul style="list-style-type: none"> <li>• participants recruited from a previous study (Augustsson et al. 1994)</li> <li>• men and women aged 70 years and older</li> <li>• living in a defined central area of the city of Gothenburg (Johanneberg)</li> </ul>                                                | <ul style="list-style-type: none"> <li>• had taken any vitamin supplements during the last 3 months</li> <li>• had taken pharmacological doses of vitamin B12, folic acid and/or vitamin B6 during the last 3 years</li> </ul>                                                                                                                                                                                                                                                                                                                                   |
| McMahon, 2006 [80]        | Dunedin, New Zealand                                                 | <ul style="list-style-type: none"> <li>• volunteers 65 years of age or older</li> </ul>                                                                                                                                                                                                                       | <ul style="list-style-type: none"> <li>• suspected dementia</li> <li>• taking medications known to interfere with folate metabolism (e.g., oral hypoglycemic agents or antiepileptic agents)</li> <li>• taking vitamin supplements containing folic acid, vitamin B12, or vitamin B6</li> <li>• being treated for depression</li> <li>• diabetes</li> <li>• history of stroke or transient ischemic attacks</li> </ul>                                                                                                                                           |
| Schlichtiger, 1996 [81]   | licensed general practitioners, internists and neurologists, Germany | <ul style="list-style-type: none"> <li>• men and women 65-85 years of age</li> <li>• lost of vitality that led to reduced quality of life</li> <li>• Nürnberger Alltags-Beobachtungs-Skala (NAB) &lt;22</li> <li>• SF-36 subscale “vitality” between <math>\geq 12</math> and <math>\leq 18</math></li> </ul> | <ul style="list-style-type: none"> <li>• severe psychiatric diseases</li> <li>• Morbus Parkinson</li> <li>• psychiatric depressions (Self-Rating Depression Scale (SDS) &gt;47)</li> <li>• dementia (cognitive minimal screening &lt;13)</li> <li>• lower intelligence (IQ<math>\leq</math>85)</li> <li>• rheumatic, muscular, nerval or joint diseases causing strong restriction of motion</li> <li>• malignant diseases</li> <li>• uncontrolled diabetes mellitus</li> <li>• decompensated heart failure</li> <li>• unstable arterial hypertension</li> </ul> |
| van der Zwaluw, 2014 [82] | Erasmus Medical Center (EMC, Rotterdam), VU University Medical       | <ul style="list-style-type: none"> <li>• men and women aged 65 years and older</li> <li>• independently living or institutionalized</li> </ul>                                                                                                                                                                | <ul style="list-style-type: none"> <li>• immobilization: being bedridden or wheelchair bound</li> <li>• cancer diagnosis within the last 5 year, except skin cancer as basal cell carcinoma and squamous cell carcinoma</li> </ul>                                                                                                                                                                                                                                                                                                                               |

| Author, year           | Study location, country                                                          | Inclusion                                                                                                                                                                                                                                                                                                                                                                                                                                                                                                                                                                                                                                                                                                                                                                                                                                                                                                                                                                                                                                                                                                                                                                                                                                                                                                                                                                                                                                                                                                                                                      | Exclusion                                                                                                                                                                                                                                                                                                                                               |
|------------------------|----------------------------------------------------------------------------------|----------------------------------------------------------------------------------------------------------------------------------------------------------------------------------------------------------------------------------------------------------------------------------------------------------------------------------------------------------------------------------------------------------------------------------------------------------------------------------------------------------------------------------------------------------------------------------------------------------------------------------------------------------------------------------------------------------------------------------------------------------------------------------------------------------------------------------------------------------------------------------------------------------------------------------------------------------------------------------------------------------------------------------------------------------------------------------------------------------------------------------------------------------------------------------------------------------------------------------------------------------------------------------------------------------------------------------------------------------------------------------------------------------------------------------------------------------------------------------------------------------------------------------------------------------------|---------------------------------------------------------------------------------------------------------------------------------------------------------------------------------------------------------------------------------------------------------------------------------------------------------------------------------------------------------|
|                        | Center (VUmc, Amsterdam) and Wageningen University (WU, Wageningen), Netherlands | <ul style="list-style-type: none"> <li>• compliance for tablet intake of &gt; 85% 4-6 weeks prior to start of the trial</li> <li>• competent to make own decisions</li> <li>• elevated homocysteine level (<math>\geq 12 \mu\text{mol/L}</math> and <math>\leq 50 \mu\text{mol/L}</math>)</li> </ul>                                                                                                                                                                                                                                                                                                                                                                                                                                                                                                                                                                                                                                                                                                                                                                                                                                                                                                                                                                                                                                                                                                                                                                                                                                                           | <ul style="list-style-type: none"> <li>• serum creatinine level <math>&gt; 150 \mu\text{mol/L}</math></li> <li>• current or recent (&lt;4 months) use of supplements with very high doses of vitamin B12 (intramuscular injections) or folic acid (<math>&gt; 300 \mu\text{g}</math>)</li> <li>• participation in other intervention studies</li> </ul> |
| van Uffelen, 2008 [83] | Alkmaar, Netherlands                                                             | <ul style="list-style-type: none"> <li>• independently living elderly aged between 70 and 80 years with mild cognitive impairment (MCI) defined as follows: <ul style="list-style-type: none"> <li>- memory complaints (answer “yes” to question “do you have memory complaints”, or at least twice answering “sometimes” on the Strawbridge cognition scale)</li> <li>- objective memory impairment (10 word learning test (WLT) delayed recall <math>\leq 5</math> and percentage savings <math>\leq 100</math>)</li> <li>- normal general cognitive function/absence of dementia (telephone interview for cognitive status (TICS) <math>\geq 19</math> and mini mental state examination (MMSE) <math>\geq 24</math>)</li> <li>- intact daily functioning (no report of disability in activities of daily living on Groningen activity restriction scale (GARS), except on the item “taking care of feet and toe nails”)</li> </ul> </li> <li>• being able to perform moderate intensity physical activity without making use of walking devices—for example, a rollator or a walking frame</li> <li>• not using vitamin supplements/vitamin injections/drinks with folic acid, vitamins B-12 and B-6, comparable to the vitamin supplement given in the intervention</li> <li>• not suffering from epilepsy, multiple sclerosis, Parkinson’s disease, kidney disorder requiring haemodialysis, psychiatric impairment</li> <li>• not suffering from depression as measured by the geriatric depression scale (GDS, cut off <math>\leq 5</math>)</li> </ul> | <ul style="list-style-type: none"> <li>• see inclusion criteria</li> </ul>                                                                                                                                                                                                                                                                              |

| Author, year      | Study location, country | Inclusion                                                                                                                                                                                                                                                                                                                                                                                                                                                                                                                                                                                                                                                                          | Exclusion                                                                                                                                                                                                                                                                                       |
|-------------------|-------------------------|------------------------------------------------------------------------------------------------------------------------------------------------------------------------------------------------------------------------------------------------------------------------------------------------------------------------------------------------------------------------------------------------------------------------------------------------------------------------------------------------------------------------------------------------------------------------------------------------------------------------------------------------------------------------------------|-------------------------------------------------------------------------------------------------------------------------------------------------------------------------------------------------------------------------------------------------------------------------------------------------|
|                   |                         | <ul style="list-style-type: none"> <li>• not using medication for rheumatoid arthritis or psoriasis which interfered with the vitamin supplement</li> <li>• no alcohol abuse (men &lt;21 drinks a week, women &lt;15 drinks a week)</li> <li>• not currently living in a nursing home or on a waiting list for a nursing home"</li> </ul>                                                                                                                                                                                                                                                                                                                                          |                                                                                                                                                                                                                                                                                                 |
| Walker, 2010 [85] | Australia               | <ul style="list-style-type: none"> <li>• elevated psychological distress as assessed by the K10 with scores 16 or greater (scores &lt;16 indicate no or low levels of psychological distress)</li> <li>• did not engage in physical activity at public health recommended levels as indicated by International Physical Activity Questionnaire (IPAQ) scores</li> <li>• did not take folic acid, vitamin B12 or vitamin B complex supplements</li> <li>• had no history of dementia, bipolar disorder or current suicide risk</li> <li>• had competent literacy skills</li> <li>• did not have a medical condition that would contraindicate exercise or folic acid use</li> </ul> | <ul style="list-style-type: none"> <li>• high likelihood of a depressive disorder with K10 scores of 30 or greater</li> <li>• low levels of red cell folate (&lt;250 nmol/l) and vitamin B12 (&lt;130 nmol/l)</li> <li>• abnormal thyroid-stimulating hormone levels (0.35–5.0 mu/l)</li> </ul> |
| Walker, 2012 [84] | Australia               | <ul style="list-style-type: none"> <li>• elevated psychological distress as assessed by the K10 with scores 16 or greater (scores &lt;16 indicate no or low levels of psychological distress)</li> <li>• did not engage in physical activity at public health recommended levels as indicated by International Physical Activity Questionnaire (IPAQ) scores</li> <li>• did not take folic acid, vitamin B12 or vitamin B complex supplements</li> <li>• had no history of dementia, bipolar disorder or current suicide risk</li> <li>• had competent literacy skills</li> <li>• did not have a medical condition that would contraindicate exercise or folic acid use</li> </ul> | <ul style="list-style-type: none"> <li>• high likelihood of a depressive disorder with K10 scores of 30 or greater</li> <li>• low levels of red cell folate (&lt;250 nmol/l) and vitamin B12 (&lt;130 nmol/l)</li> <li>• abnormal thyroid-stimulating hormone levels (0.35–5.0 mu/l)</li> </ul> |

## Supplement Table S6: GRADE summary of findings

| Certainty assessment       |                   |                          |                          |                      |                          |                      | № of patients |         | Effect            |                                                          | Certainty        | Importance |
|----------------------------|-------------------|--------------------------|--------------------------|----------------------|--------------------------|----------------------|---------------|---------|-------------------|----------------------------------------------------------|------------------|------------|
| № of studies               | Study design      | Risk of bias             | Inconsistency            | Indirectness         | Imprecision              | Other considerations | Intervention  | Placebo | Relative (95% CI) | Absolute (95% CI)                                        |                  |            |
| <i>Cognitive Executive</i> |                   |                          |                          |                      |                          |                      |               |         |                   |                                                          |                  |            |
| 10                         | randomised trials | not serious <sup>a</sup> | not serious <sup>b</sup> | serious <sup>c</sup> | not serious <sup>d</sup> | none                 | 1178          | 1147    | -                 | SMD <b>0.06 SD higher</b><br>(0.02 lower to 0.14 higher) | ⊕⊕⊕○<br>MODERATE | CRITICAL   |
| <i>Cognitive Memory</i>    |                   |                          |                          |                      |                          |                      |               |         |                   |                                                          |                  |            |
| 12                         | randomised trials | not serious <sup>e</sup> | not serious <sup>f</sup> | serious <sup>c</sup> | not serious <sup>d</sup> | none                 | 2559          | 2523    | -                 | SMD <b>0.03 SD higher</b><br>(0.01 lower to 0.07 higher) | ⊕⊕⊕○<br>MODERATE | CRITICAL   |
| <i>Cognitive Global</i>    |                   |                          |                          |                      |                          |                      |               |         |                   |                                                          |                  |            |
| 7                          | randomised trials | not serious              | not serious <sup>g</sup> | serious <sup>c</sup> | not serious <sup>d</sup> | none                 | 1807          | 1814    | -                 | SMD <b>0.06 SD higher</b><br>(0 to 0.12 higher)          | ⊕⊕⊕○<br>MODERATE | IMPORTANT  |
| <i>Cognitive Speed</i>     |                   |                          |                          |                      |                          |                      |               |         |                   |                                                          |                  |            |
| 8                          | randomised trials | not serious <sup>h</sup> | not serious <sup>i</sup> | serious <sup>c</sup> | not serious <sup>d</sup> | none                 | 907           | 876     | -                 | SMD <b>0.08 SD lower</b><br>(0.18 lower to 0.01 higher)  | ⊕⊕⊕○<br>MODERATE | IMPORTANT  |
| <i>Depression</i>          |                   |                          |                          |                      |                          |                      |               |         |                   |                                                          |                  |            |
| 6                          | randomised trials | not serious <sup>j</sup> | not serious <sup>k</sup> | serious <sup>c</sup> | not serious <sup>d</sup> | none                 | 2448          | 2487    | -                 | SMD <b>0.05 SD lower</b><br>(0.15 lower to 0.05 higher)  | ⊕⊕⊕○<br>MODERATE | IMPORTANT  |

CI: Confidence interval; SMD: Standardised mean difference

### Explanations

- a. 1/9 had some concerns reported due to "Deviations from intended interventions". 2/9 had some concerns reported due to "Selection of the reported result".
- b. Pooled I-squared=13.1%, p=0.82. Good overlap of confidence intervals.
- c. duration of intervention varied across trials; different tests/instruments were used for the same outcome domain; different vitamin intervention (B12 alone or B complex) and application doses
- d. Confidence interval is within +0.2 (Cochrane Handbook, Version 6.1, 2020, Chapter 15.5.3.1), commonly used as minimum thresholds for small effects
- e. 1/11 had some concerns reported due to "Deviations from intended interventions". 2/11 had some concerns reported due to "Selection of the reported result".
- f. Pooled I-squared=0.0%, p=0.98. Good overlap of confidence intervals.
- g. Pooled I-squared=0.0%, p=0.95. Good overlap of confidence intervals.



h. 1/7 had some concerns reported due to "Deviations from intended interventions". 2/7 had some concerns reported due to "Selection of the reported result".

i. Pooled I-squared=13.9%, p=0.88. Good overlap of confidence intervals.

j. 1/6 had some concerns reported due to "Missing outcome data".

k. Pooled I-squared=22.5%, p=0.50. Good overlap of confidence intervals.

**Supplement Table S7: Meta-regression models for the analysis of the cognitive executive and memory subdomains**

| Outcome subdomain                               | Term                                     | Estimate | 95% CI LB | 95% CI UB | p-value |
|-------------------------------------------------|------------------------------------------|----------|-----------|-----------|---------|
| <i>With baseline vitamin B12 serum level</i>    |                                          |          |           |           |         |
| Cognitive Executive                             | Intercept                                | 0.14     | -2.572    | 2.851     | 0.91    |
|                                                 | Baseline vitamin B12 serum level         | 0        | -0.005    | 0.005     | 0.98    |
|                                                 | Vitamin intervention B complex           | -0.036   | -0.583    | 0.511     | 0.89    |
|                                                 | Duration of treatment (in weeks)         | -0.002   | -0.016    | 0.012     | 0.75    |
|                                                 | Average bioavailable daily dose (in mcg) | 0.003    | -0.198    | 0.204     | 0.97    |
|                                                 | Population “No MCI to MCI”               | -0.252   | -0.800    | 0.295     | 0.35    |
|                                                 | Duration * daily dose                    | 0        | -0.002    | 0.002     | 0.71    |
| Cognitive Memory                                | Intercept                                | -0.39    | -1.003    | 0.223     | 0.2     |
|                                                 | Baseline vitamin B12 serum level         | 0        | -0.002    | 0.002     | 0.95    |
|                                                 | Vitamin intervention B complex           | 0.189    | -0.055    | 0.433     | 0.12    |
|                                                 | Duration of treatment (in weeks)         | 0.002    | -0.001    | 0.005     | 0.11    |
|                                                 | Average bioavailable daily dose (in mcg) | 0.02     | -0.008    | 0.047     | 0.15    |
|                                                 | Population “No MCI to MCI”               | 0.213    | -0.035    | 0.461     | 0.09    |
|                                                 | Duration * daily dose                    | 0        | -0.001    | 0         | 0.23    |
| <i>Without baseline vitamin B12 serum level</i> |                                          |          |           |           |         |
| Cognitive Executive                             | Intercept                                | 0.103    | -0.946    | 1.153     | 0.84    |
|                                                 | Vitamin intervention B complex           | -0.015   | -0.470    | 0.440     | 0.95    |
|                                                 | Duration of treatment (in weeks)         | -0.001   | -0.010    | 0.007     | 0.73    |
|                                                 | Average bioavailable daily dose (in mcg) | 0.018    | -0.105    | 0.140     | 0.77    |
|                                                 | Population “No MCI”                      | -0.077   | -0.383    | 0.228     | 0.61    |

|                  |                                          |        |        |       |      |
|------------------|------------------------------------------|--------|--------|-------|------|
|                  | Population “No MCI to MCI”               | -0.354 | -0.890 | 0.181 | 0.19 |
|                  | Duration * daily dose                    | 0      | -0.001 | 0.001 | 0.66 |
| Cognitive Memory | Intercept                                | -0.399 | -0.832 | 0.033 | 0.07 |
|                  | Vitamin intervention B complex           | 0.189  | -0.048 | 0.425 | 0.11 |
|                  | Duration of treatment (in weeks)         | 0.002  | -0.001 | 0.005 | 0.12 |
|                  | Average bioavailable daily dose (in mcg) | 0.019  | -0.008 | 0.046 | 0.16 |
|                  | Population “No MCI”                      | 0.041  | -0.194 | 0.277 | 0.72 |
|                  | Population “No MCI to MCI”               | 0.253  | -0.076 | 0.582 | 0.13 |
|                  | Duration * daily dose                    | 0      | -0.001 | 0     | 0.22 |

CI: confidence interval; LB: lower bound; UB: upper bound

## Supplement Figure S1: Quality assessment of included studies

|           |                     | Randomization process | Deviations from intended interventions | Missing outcome data | Measurement of the outcome | Selection of the reported result | Overall bias |
|-----------|---------------------|-----------------------|----------------------------------------|----------------------|----------------------------|----------------------------------|--------------|
| B12 alone | Dangour [72]        | 2015                  | ●                                      | ●                    | ●                          | ●                                | ●            |
|           | Eussen [87]         | 2006                  | ●                                      | ●                    | ●                          | ●                                | ●            |
|           | Hvas [73]           | 2004                  | ●                                      | ●                    | ●                          | ●                                | ●            |
|           | Kwok [74]           | 2017                  | ●                                      | ●                    | ●                          | ●                                | ●            |
|           | Ellis* [71]         | 1973                  | ●                                      | ●                    | ●                          | ●                                | ●            |
| B complex | Christensen [75]    | 2011                  | ●                                      | ●                    | ●                          | ●                                | ●            |
|           | de Koning [76]      | 2016                  | ●                                      | ●                    | ●                          | ●                                | ●            |
|           | Eussen [87]         | 2006                  | ●                                      | ●                    | ●                          | ●                                | ●            |
|           | Ford [78]           | 2008                  | ●                                      | ●                    | ●                          | ●                                | ●            |
|           | Ford [77]           | 2010                  | ●                                      | ●                    | ●                          | ●                                | ●            |
|           | Kwok [86]           | 2020                  | ●                                      | ●                    | ●                          | ●                                | ●            |
|           | Lewerin [79]        | 2005                  | ●                                      | ●                    | ●                          | ●                                | ●            |
|           | McMahon [80]        | 2006                  | ●                                      | ●                    | ●                          | ●                                | ●            |
|           | Schlichtiger [81]   | 1996                  | ●                                      | ●                    | ●                          | ●                                | ●            |
|           | van der Zwaluw [82] | 2014                  | ●                                      | ●                    | ●                          | ●                                | ●            |
|           | von Uffelen [83]    | 2008                  | ●                                      | ●                    | ●                          | ●                                | ●            |
|           | Walker [85]         | 2010                  | ●                                      | ●                    | ●                          | ●                                | ●            |
|           | Walker [84]         | 2012                  | ●                                      | ●                    | ●                          | ●                                | ●            |

- Low risk
- Some concerns
- High risk

\* = not included in the analysis

## Supplement Figure S2: Funnel plots for cognitive function subdomains and depression domain

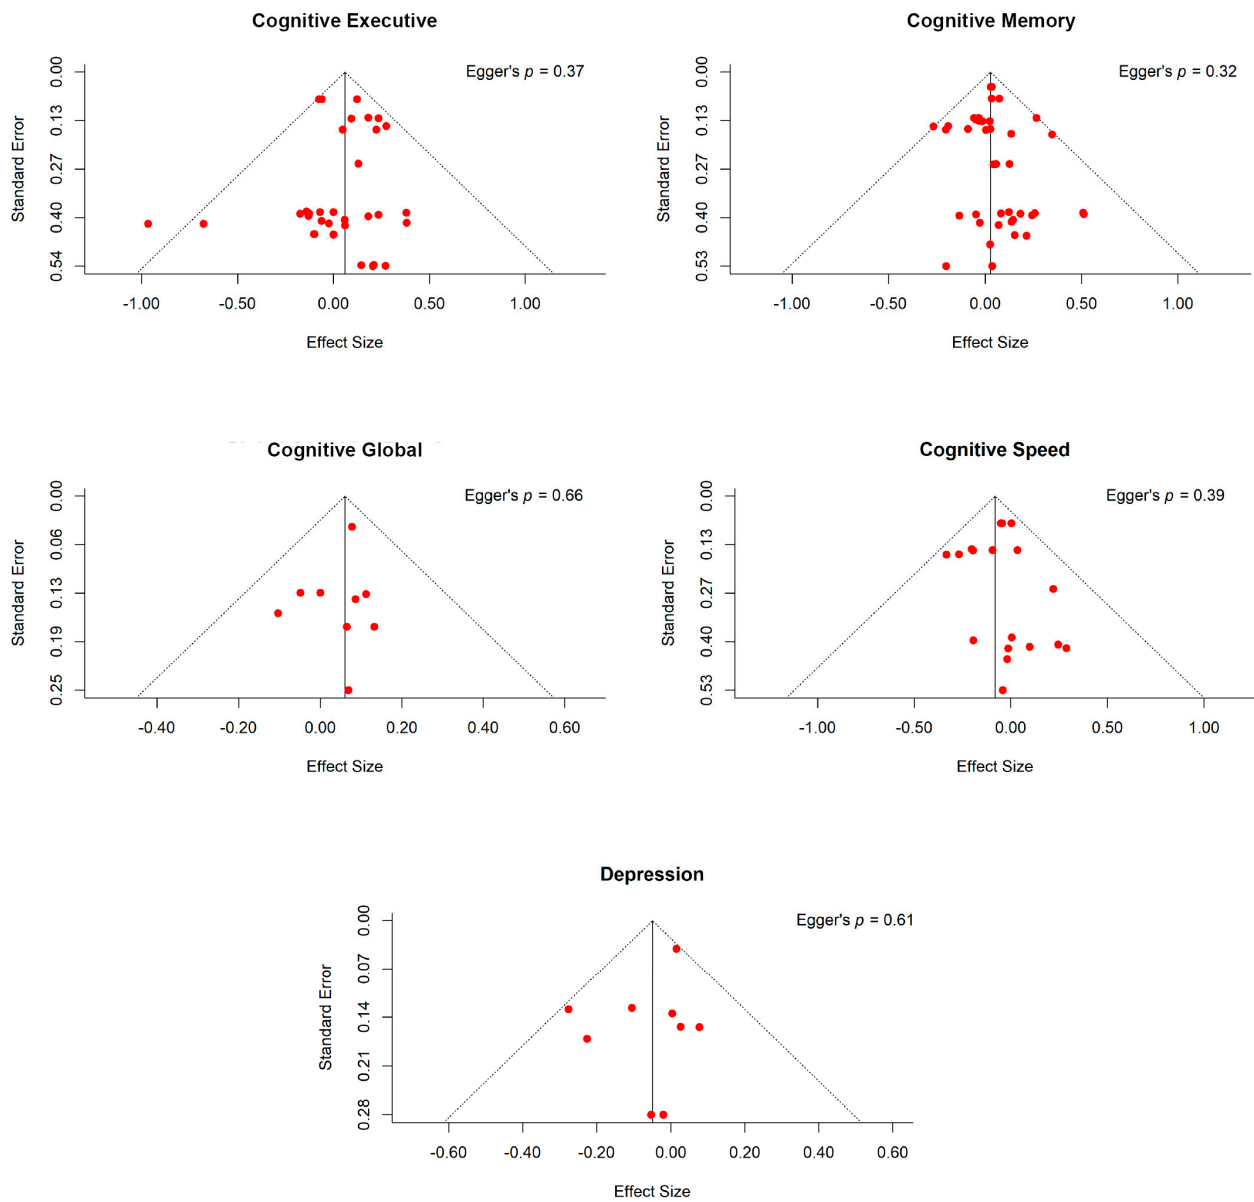

Each red circle corresponds to a clinical test outcome. The diagonal lines show the expected 95% confidence intervals around the summary estimate.

### Supplement Figure S3: Forrest plot for effects on cognitive global function

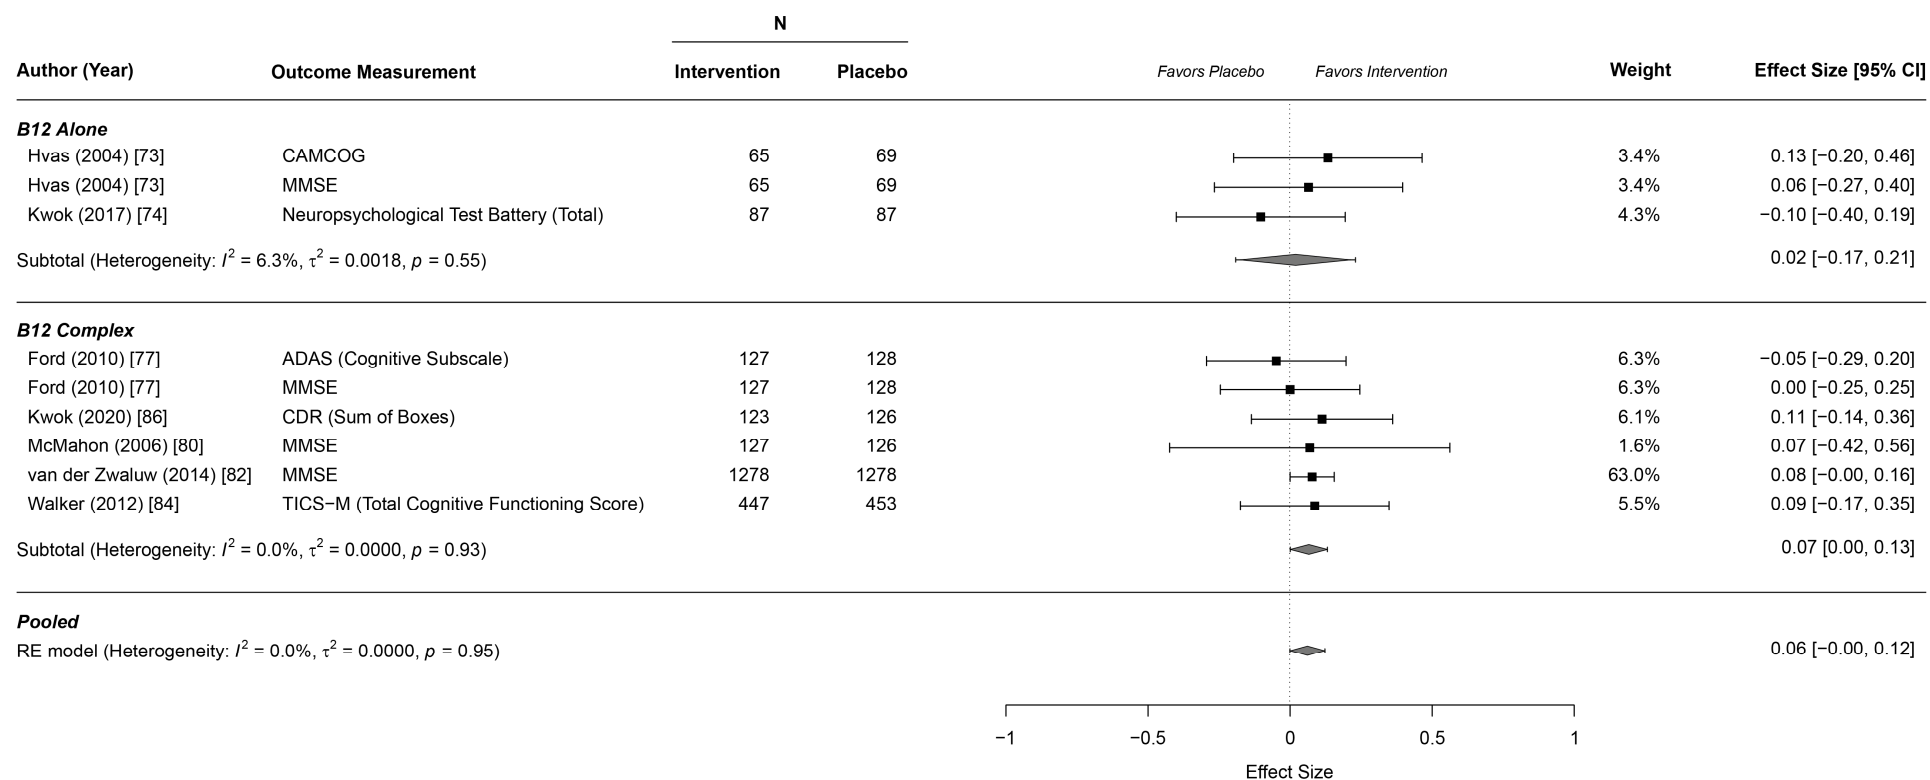

CAMCOG: Cambridge Cognitive Examination; CDR: Clinical Dementia Rating; MMSE: Mini-Mental State Examination; TICS-M: Telephone Interview for Cognitive Status Modified

### Supplement Figure S4: Forrest plot for effects on cognitive speed function

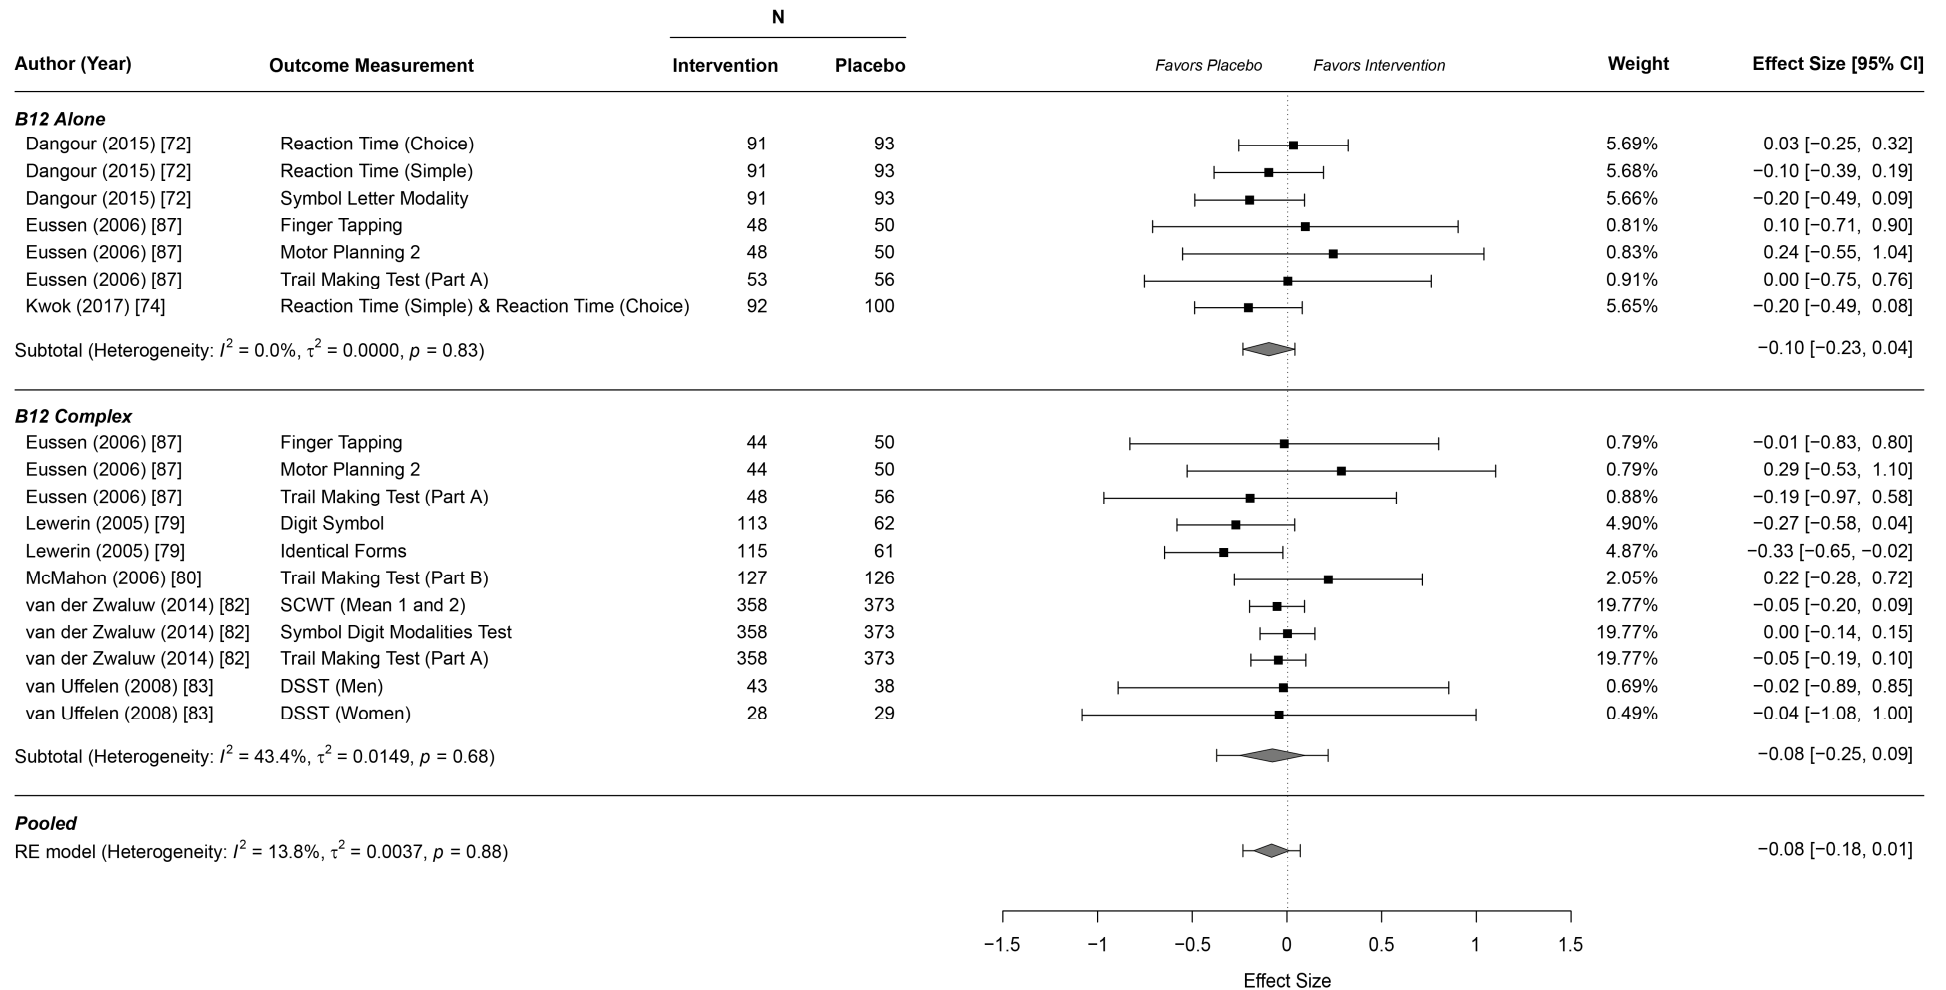

DSST: Digit Symbol Substitution Test; SCWT: Stroop Color-Word Test
